# ***CAFE MOCHA: An Integrated Platform for Discovering Clinically Relevant Molecular Changes in Cancer; an Example of Distant Metastasis and Recurrence-linked Classifiers in Head and Neck Squamous Cell Carcinoma***

Neeraja M Krishnan<sup>1</sup>, Mohanraj I<sup>1</sup>, Janani Hariharan<sup>1</sup>, and Binay Panda<sup>1,2\*</sup>

<sup>1</sup>Ganit Labs, Bio-IT Centre, Institute of Bioinformatics and Applied Biotechnology, Bangalore, Karnataka 560100, India

<sup>2</sup>Strand Life Sciences, Bangalore, Karnataka 560024, India

\*To whom correspondence should be addressed. Email: [binay@ganitlabs.in](mailto:binay@ganitlabs.in)

## **Abstract**

### **Background**

*CAFE MOCHA* (Clinical Association of Functionally Established MOlecular CHAngeS) is an integrated GUI-driven computational and statistical framework to discover molecular signatures linked to a specific clinical attribute in a cancer type. We tested *CAFE MOCHA* in head and neck squamous cell carcinoma (HNSCC) for discovering a signature linked to distant metastasis and recurrence (MR) in 517 tumors from TCGA and validated the signature in 18 tumors from an independent cohort.

### **Methods**

The platform integrates mutations and indels, gene expression, DNA methylation and copy number variations to discover a classifier first, predict an incoming tumour for the same by pulling defined class variables into a single framework that incorporates a coordinate geometry-based algorithm, called Complete Specificity Margin Based Clustering (CSMBC) with 100% specificity. *CAFE MOCHA* classifies an incoming tumour sample using either a matched normal or a built-in database of normal tissues. The application is packed and

27 deployed using the *install4j* multi-platform installer.

## 28 **Results**

29 We tested *CAFE MOCHA* to discover a signature for distant metastasis and recurrence in  
30 HNSCC. The signature MR44 in HNSCC yielded 80% sensitivity and 100% specificity in  
31 the discovery stage and 100% sensitivity and 100% specificity in the validation stage.

## 32 **Conclusions**

33 *CAFE MOCHA* is a cancer type- and clinical attribute-agnostic computational and  
34 statistical framework to discover integrated molecular signature for a specific clinical  
35 attribute.

36  
37 *CAFE MOCHA* is available in GitHub (<https://github.com/binaypanda/CAFEMOCHA>).

38  
39 Key Words: mutation, methylation, gene expression, copy number variation (CNV),  
40 sensitivity, specificity and integrated platform.

41

42

43

44

## 45 **Introduction**

46 Cancer progression is linked to molecular changes at multiple levels, such as  
 47 somatic mutations, gene expression, DNA methylation and copy number changes. In the  
 48 last 5yrs, a large amount of data on key variants in multiple cancers has been generated  
 49 by international consortia, like The Cancer Genome Atlas (TCGA) (Editorial, 2015;  
 50 Weinstein *et al*, 2013), International Cancer Genome Consortium (ICGC) (Hudson *et al*,  
 51 2010) and individual laboratories, aiding our understanding of various cancers at molecular  
 52 level. Utilizing the vast amount of molecular data from studies on tumour genomes,  
 53 exomes, transcriptomes and methylomes, and linking those with data from genetic and  
 54 functional studies will help find clinically relevant insights. Although there are existing  
 55 databases and studies that combine molecular changes across cancer types (Deng *et al*,  
 56 2016; Huang *et al*, 2015; Netanelly *et al*, 2016), studies linking the events explicitly within  
 57 the same tumour type across a large number of samples to predict signatures for a  
 58 specific clinical attribute are currently lacking.

59 Here, we describe a cancer type-agnostic computational and statistical framework  
 60 with a user-friendly graphical-user-interface (GUI) to discover integrated signatures using  
 61 six tumour-specific event types; somatic mutations and indels (mut), DNA copy number  
 62 changes (cnv), gene expression changes (expr), 5-cytosine DNA methylation changes  
 63 (meth), functional copy number changes (fcnv, where CNVs are linked to gene expression  
 64 changes) and functional *cis*-regulatory DNA methylation changes (fmeth, where hyper-  
 65 and hypo-methylation result in down- and up-regulation of effector gene expression  
 66 respectively). *CAFE MOCHA*, in addition to classifying categorical events like mut and cnv,  
 67 uses an algorithm called Complete Specificity Margin Based Clustering (CSMBC) to  
 68 classify quantitative (expr and meth) and coupled events (fmeth and fcnv), and combines  
 69 the event types using sample frequency and event priority filters, to produce integrated

signatures describing the clinical variable with 100% specificity. We tested *CAFE MOCHA* to discover a signature linked with distant metastasis and recurrence in head and neck squamous cell carcinoma (HNSCC) using 434 tumours from TCGA as a discovery cohort, which was validated in an independent cohort of 18 tumours. The integrated signature MR44 for metastatic and recurrent tumours in HNSCC (MR44) yielded a sensitivity of 79.52% and a specificity of 100% in the discovery cohort and with 100% sensitivity and 100% specificity in the validation cohort.

## Materials and Methods

### *Discovery module*

*CAFE MOCHA* application workflow and the GUI are illustrated in Figure 1. *CAFE MOCHA* has two independent modules, discovery and prediction. In the discovery module, both somatic mutations (missense, nonsense and splice-site) and indels were considered under mut. A matrix of following values (thresholds) were considered for cnvs; -2: full copy deletion, -1: allelic deletion, 1: low-copy amplification, 2: high-copy amplification, and 0: lack of any copy number variation. For expression and methylation, RSEM (Li & Dewey, 2011) -normalized gene-wise intensity matrix and a probe-wise matrix of pre-processed  $\beta$  values (from Illumina 450k whole-genome methylation arrays), respectively, were used. The methylation data was pre-processed, including normalization and batch correction, as described previously (Krishnan *et al*, 2016). Tumour samples assayed for all the four events (mut, cnv, expr and meth) were considered for the discovery phase. The perturbed genes were passed through a functional filter (detailed below) before being used in the integrated analysis. In the case of methylation data, a sub-region filter was applied and only probes located in the gene promoters, transcription start site (TSS200 and TSS1500) and CpG islands were retained. Categorical events like mut and cnvs were linked to the

chosen clinical attributes with complete specificity. Quantitative events such as expression (expr) and methylation (meth) were linked to clinical attributes using an algorithm called Complete Specificity Margin Based Clustering (CSMBC) algorithm (detailed below). A somatic filter based on an unpaired  $t$ -test ( $P < 0.05$ ) was further used to retain only tumour-specific expr and meth events. Expression events were further coupled with meth and cnvs to generate coupled events (fmeth and fcncv) respectively, where meth and cnvs affected the target gene expression. We only considered hyper- and hypo-methylation events linked with the down- and up-regulation of downstream gene expression respectively.

#### *Data integration and making of the final signature*

Using the 'integrate' feature, the individually discovered events were combined into an integrated signature with two different filters (Figure 1B). In the first, a tumour-specific sample frequency-based filter agnostic to any event type was applied. In the second, all event types' priorities were determined by detection sensitivity first and then those events that yield highest priority followed by highest sample frequency were chosen. These two filters work contrarily, one retaining the high sample frequency quantitative and semi-quantitative event types (expr, meth, fmeth, fcncv) and another the lower-sample frequency categorical and semi-categorical event types (mut, cnv, fcncv). Selected events were considered for removal of false positives using samples lacking complete cross-platform overlap from TCGA and the independently provided datasets (used for confirmation in the second stage of the discovery stage). The number of confirmed events was further minimized using the sample frequency-based filter to constitute the discovery panel for that specific clinical attribute. This minimal signature is then subjected to an independent validation using tumours assayed for all the four events (mut, cnv, expr, meth) (Figure 1B). Finally, the discovered events were mapped to all of the sixteen cancer-related pathways

from KEGG (Kanehisa *et al*, 2002; Kanehisa *et al*, 2004; Kanehisa *et al*, 2012)  
(hsa05200).

### *CAFE MOCHA Interface*

The interface for *CAFE MOCHA* was developed and deployed using *Netbeans IDE v 8.1* (<https://netbeans.org/downloads/>). The Graphical User Interface (GUI) was designed using JAVA AWT (<http://www.javatpoint.com/java-awt>) with SWING components (<http://www.javatpoint.com/java-swing>) with its native OS GUI and appropriate controls. The back end for this interface was built on a Linux-dependent platform with *R*, *BASH*, *BEDTools* (v2.3) and *PERL* as added dependencies. *CAFE MOCHA* requires installations of *R* package dependencies (minfi v1.18.2 (Aryee *et al*, 2014), waterMelon v1.16.0 (Pidsley *et al*, 2013), IlluminaHumanMethylation450kmanifest v0.4.0, randomForest v4.6.12 (Breiman, 2001), varSelRF v0.7.5, pheatmap v1.0.8, gplots v3.0.1, ggplot2 v2.1.0, reshape2 v1.4.1) to pre-process 450k *idat* files and generates the matrix of  $\beta$  values. The platform provides the user with an option to install the dependencies. Under the discovery module, mut, cnv, expr and meth data can be browsed and acquired locally.

### *Functional filters*

To ensure functional relevance of predicted tumour-specific molecular changes, we introduced various filters for different events to select genes of interest. We used IntOGen (Gundem *et al*, 2010) to select driver/potential driver mutations, MethHC (Huang *et al*, 2015) for known hyper- and hypomethylated genes in different cancer types, G2SBC (Mosca *et al*, 2010) for selecting important differentially expressed genes associated with breast cancer, The Human Protein Atlas (Uhlen *et al*, 2015) for functional proteins, the dbDEPC 2.0 database (He *et al*, 2012) for manually curated differentially expressed

proteins in human cancer and miRTarBase (Chou *et al*, 2016; Hsu *et al*, 2011; Hsu *et al*, 2014) for experimentally validated miRNA-target gene associations. In the case of micro-RNA methylation, we considered those events where methylation of a microRNA correlated with a concomitant expression change in one or more of its target gene(s). In the case of *fcnv*, we considered where amplification and deletion in a gene was linked to its up- and down-regulation respectively in tumour sample compared to normal. Only full copy deletions (not allelic deletions) and amplifications were considered. Genes bearing categorical events in at least one sample that passed the functional filter were considered further.

### *Complete Specificity Margin Based Clustering (CSMBC)*

We devised a statistically framework, Complete Specificity Margin Based Clustering or CSMBC, for inferring the expression and the methylation boundaries of each cluster for a specific clinical attribute (Figure 2). In CSMBC, the number of clusters were fixed equivalent to the number of pre-defined clinical variables. For each cluster, axis-perpendicular boundaries passing through the most extreme outliers on the expression/methylation coordinate axes were determined first. The number of overlaps was dependent upon the number of boundaries. In the simplest case, there can be two sub-categories. For example, metastasis as a category has two sub-categories, metastatic (A); and non-metastatic (B). In this simplest case, there can only be one overlap ( $A \cap B$ ). Likewise, if a clinical attribute has three (A, B and C) sub-categories (for example recurrent, non-recurrent, can't be defined) with four possible overlaps ( $A \cap B, A \cap C, B \cap C, A \cap B \cap C$ ). Using the above logic defined for categories and sub-categories, all possible overlaps between clusters were identified first, and then the minimum and maximum values for various overlaps were estimated according to the following equations:

173

174 For overlap between two sub-categories:

$$175 \quad i \cap j_{\min} = \max(i, j); i \cap j_{\max} = \min(i, j)$$

176

177 For overlap between three sub-categories:

$$178 \quad i \cap j \cap k_{\min} = \max(i, j, k); i \cap j \cap k_{\max} = \min(i, j, k)$$

179

180 For overlap between four sub-categories:

$$181 \quad i \cap j \cap k \cap l_{\min} = \max(i, j, k, l); i \cap j \cap k \cap l_{\max} = \min(i, j, k, l)$$

182

183 A sample was identified to be within 100% specificity margin of the cluster if it was not  
184 in any region of overlap with other clusters (Figure 2). The total number of all such  
185 samples, i.e., sensitivity of that cluster, was estimated according to the equation below:

186

187 For two sub-categories:

$$188 \quad \text{sensitivity}_i = n_i - n_{i \cap j}$$

189 For three sub-categories:

$$190 \quad \text{sensitivity}_i = n_i - n_{i \cap j} - n_{i \cap k} + n_{i \cap j \cap k}$$

191 For four sub-categories:

$$192 \quad \text{sensitivity}_i = n_i - n_{i \cap j} - n_{i \cap k} - n_{i \cap l} + n_{i \cap j \cap k} + n_{i \cap j \cap l} + n_{i \cap k \cap l} - n_{i \cap j \cap k \cap l}$$

193

194 Finally, an unpaired *t*-test was performed between all tumour and all normal samples,  
195 and genes/probes with significantly different expr/meth values ( $P < 0.05$ ) between the  
196 tumour and normal groups were retained.

197



## 198 *Prediction module*

199       The prediction module has two options: one, where the user provides somatic  
200 mutations/indels, tumour-specific expr, meth and cnv information, and second, where the  
201 user has somatic mutations/indel/cnv data but does not have expr and meth data from the  
202 matched normal samples. In the later case, *CAFE MOCHA* uses a built in normal  
203 database (all normal samples from the TCGA for a particular cancer type) to compute  
204 expression and methylation values for genes in control samples from RNASeq for  
205 expression and whole genome arrays (Illumina 450k) for DNA methylation. For the  
206 prediction module, the data is entered as per the pre-defined format (same as discovery  
207 panel) specific to a cancer type and clinical attribute of interest (Figure 1). Based on the  
208 user input, coupled events (fmeth and fcnv) are determined and used for the prediction  
209 module.

210

## 211 *Testing CAFE MOCHA to discover metastatic/recurrent HNSCC signature*

212       We tested *CAFE MOCHA* to discover integrated signature for metastatic and recurrent  
213 HNSCC tumours using tumours from TCGA dataset (n=434), followed by confirmation  
214 (removal of false positives, the second stage of the discovery phase) using two sample  
215 cohorts, 42 samples from TCGA and 37 samples from an independent cohort (Krishnan *et al*  
216 *al*, 2015; Krishnan *et al*, 2016), where the information on at least one of the event type out  
217 of the 4 events (mut, cnv, expr and meth) for the same tumour was available (Table 1,  
218 Supplementary Tables S1 and S2). Finally, the discovery panel was validated in 18  
219 samples from an independent sample cohort (Krishnan *et al*, 2015; Krishnan *et al*, 2016),  
220 where all the four events were assayed for all the tumours (Supplementary Table S3). For  
221 the discovery module, we downloaded the Broad automated somatic mutations and indel  
222 call file, copy number data with gistic2 threshold, Illumina HiSeqV2 RSEM (7) -normalized  
223 RNA-seq gene expression data, 450k DNA methylation data and the clinical data from the

224 UCSC Xena Browser (<http://tinyurl.com/jhmg9b9>). The distant metastasis (M1) and  
225 recurrent tumours (RFS\_IND = 1) were compared with non-metastatic (M0) and non-  
226 recurrent (RFS\_IND = 0) tumours to derive a specific signature.

227

## 228 **Results**

229 *Discovery of distant metastasis/recurrence-associated molecular signature MR44 in*  
230 *HNSCC*

231 *CAFE MOCHA* identified a total of 6649 events from individual event type discovery (8  
232 somatic mutations, 1436 cnvs (506 amplifications and 982 full copy deletions), 1098  
233 expression-related events, 4018 methylation events, 27 fcnv events (8 high copy  
234 amplifications and 19 full copy deletions) and 62 fmeth events), associated with metastasis  
235 and recurrence in HNSCC. Integration across discovered events was performed using two  
236 filters as described in the Methods section. The filters resulted in 79 (22 expression-related  
237 events and 57 methylated genes) and 171 (7 mut, 84 cnvs (46 amplifications and 38 full  
238 copy deletions), 24 expr, 2 meth, 25 fcnv events (8 high copy amplifications and 17 full  
239 copy deletions) and 29 fmeth events) events, individually, and 232 (7 mut, 84 cnvs (46  
240 amplifications and 38 full copy deletions), 30 expr, 57 meth, 25 fcnv events (8 high copy  
241 amplifications and 17 full copy deletions) and 29 fmeth events), cumulatively after  
242 removing any redundancy (Supplementary Table S4).

243

244 Using data at the second stage of the discovery phase (confirmation stage), 98 false  
245 positives events were eliminated. The remaining 134 events (Supplementary Figure S1)  
246 (5 mut, 83 cnvs (46 amplifications and 37 full copy deletions), 8 expr, 9 meth, 24 fcnv  
247 events (8 high copy amplifications and 16 full copy deletions) and 5 fmeth events) were  
248 further minimized to a final discovery panel of 44 events (MR44) that included 2 mut, 15  
249 cnvs (3 amplifications and 12 full copy deletions), 8 expr, 9 meth, 8 fcnv events (5 high

copy amplifications and 3 full copy deletions) and 2 fmeth events) (Figure 3A). The signature was further validated using an independent cohort of 18 samples (3 M1/R and 15 non-MR) of an independent oral tongue squamous cell carcinoma (OTSCC) cohort, with 100% sensitivity and 100% specificity. 17 out of the 44 events in MR44 signature were validated in at least one sample in the validation cohort (Figure 3B).

### *Power of integration*

We wanted to investigate the power of integration (where all the six different event types were used to derive the signature) over lesser order combinations or with individual event type, in terms of the detection sensitivity and the number of events required to achieve maximum specificity. As shown in Figure 4, the detection sensitivity showed a gradual enhancement when the number of event types increased from one to six. For single-event analyses, meth and both mut and fmeth provided with a maximum and minimum sensitivity respectively (37%, 7%, Figure 4A). The number of CNVs required to achieve the highest possible level of sensitivity in a single-event analysis was the highest (83 events with 33% sensitivity). When using more than one event type, we obtained an increase in sensitivity to various levels gradually from a single-event to a six-events signature (Figure 4). The number of CNVs and both mut and fmeth required to get similar level of sensitivity was highest and lowest respectively for all combinations. Highest sensitivity (80%) of detection was observed when all the six different event types were used to produce the integrated signature (Figure 4F). The impact of event integration on detection sensitivity was observed to be greatest when the integration was performed in the following order: meth + cnvs + expr + fmeth + fcns + mut. Each incremental integration in this order caused a gradual increase in sensitivity (37.35 → 56.63 → 68.67 → 74.70 → 77.11 → 79.52, Figure 4). The actual events for all combinations and individual event type analyses are illustrated in Supplementary Figure S1.

276

## 277 Discussion

278 Integrating multiple molecular events is a strategy proposed to identify master  
 279 regulators in cancer (Gevaert & Plevritis, 2013; Thingholm *et al*, 2016). However, a  
 280 meaningful integration should be incremental, with each level filtering out the unnecessary  
 281 and only retaining the functionally relevant associations. Furthermore, integration of data  
 282 should link a specific signature to clinically relevant tumour attributes in order for making  
 283 meaningful conclusions. Integrated analyses often fail to establish the link between  
 284 cancer-associated changes within the same tumour types across cohorts, perhaps due to  
 285 the low overlapping of clinical characteristics across cohorts and low reproducibility of  
 286 results across laboratories, geographies and discovery platforms. Additionally, data on  
 287 multiple events; genetic, transcriptomic and epigenetic changes, from the same sets of  
 288 tumour:matched normal samples are often not available , making it difficult to discover  
 289 truly integrated signatures. Nevertheless, such a discovery set, where all the events are  
 290 assayed for all tumour:normal pairs within the same cohort, is functionally more  
 291 meaningful. As multidimensionality increases with the availability of more data, especially  
 292 from the large consortia like TCGA and ICGC, it will become imperative to design and  
 293 implement easy-to-use and robust web-based platforms to discover (using a pre-defined  
 294 training set) multi-gene and multi-platform classifiers for a particular clinical attribute and  
 295 predict the same for an incoming new tumour sample. Currently, such a platform is lacking  
 296 that can discover tumour-specific genome-wide functional and somatic molecular changes  
 297 linked to a specific clinical attribute, using a sizeable multi-dimensional dataset. Keeping  
 298 this in mind, we devised *CAFE MOCHA*, an automated and integrated framework to  
 299 discover meaningful, functional and somatic molecular changes in a cancer type that links  
 300 the signature(s) to a specific clinical attribute. *CAFE MOCHA* is designed to use both user-  
 301 defined/generated and publicly available tumour and matched normal data.

302

303           Additionally, the prediction module of *CAFE MOCHA* uses a backend database of  
304 unmatched normal samples to increase the prediction scope of the tool for tumours where  
305 matched normal samples are not available, especially where expression and methylation  
306 data is not available from matched normal samples. *CAFE MOCHA* is a cancer type- and  
307 clinical attribute-agnostic tool and has the ability to pull data on several event types under  
308 a single framework. *CAFE MOCHA* classifies events into three different types, categorical  
309 (mutations and CNV), quantitative (expression and methylation) and coupled/linked  
310 (functional CNVs and functional methylation) and uses an algorithm called complete  
311 specificity margin based clustering (CSMBC), a fully supervised approach, to identify  
312 clinically linked quantitative and coupled events. CSMBC is a modification of the Large  
313 Rectangle Margin Learning (LRML) approach described previously (Kirmse & Petersohn,  
314 2011) and is conceptually similar to fast boxes which take the 'characterize' and then  
315 'discriminate' approach of classification (Goh & Rubin, 2014). The input for CSMBC is a  
316 continuous function spread across a single dimension, either expression or methylation.  
317 For both these variables, an unsupervised clustering, which requires *a priori* knowledge of  
318 the quantitative expression or methylation map, is not feasible since these are continuous  
319 variables. The selection of boundary margins, according to the chosen clinical variables on  
320 the other hand does not require any prior knowledge of the quantitative spread of these  
321 events. Additionally, supervised clustering is faster than unsupervised clustering since it  
322 does not require iterative computing and does not require re-estimation of the cluster  
323 mean. Nevertheless, as pointed out in the past (Richards, 2013), a hybrid semi-supervised  
324 approach that uses the results of an unsupervised approach such as the *k*-means or  
325 Expectation Maximization (EM) as training areas for a supervised classification, might  
326 combine the advantages of both supervised and unsupervised classification approaches.  
327 A weighted sensitivity method (Gao, 2007; Iwamoto & Pusztai, 2010) that weighs the

328 classification sensitivity of a sample based on its proximity to the nearest boundary, would  
 329 further add confidence perhaps at the cost of sensitivity, particularly while predicting the  
 330 clinical status of an incoming sample. While we plan to develop *CAFE MOCHA* taking  
 331 these modifications into account in the future, the current implementation benefits from  
 332 ensuring complete specificity for each clinical attribute-associated molecular event. One of  
 333 the limitations of CSMBC is that its specificity is entirely dependent on the denominator,  
 334 *i.e.*, sample numbers and therefore, may be sub-optimal in a scenario where fewer  
 335 numbers of tumour samples are present in the discovery set.

336

337 HNSCC are the sixth leading cause of cancer worldwide with 5-year survival of less  
 338 than 50% (Ferlay *et al*, 2010; Mishra & Meherotra, 2014). Recent high-throughput studies  
 339 employing computational methods have identified various genetic, transcriptomic and  
 340 epigenetic changes from different subsites of HNSCC from different geographies (Agrawal  
 341 *et al*, 2011; Cancer Genome Atlas, 2015; India Project Team of the International Cancer  
 342 Genome, 2013; Krishnan *et al*, 2015; Pickering *et al*, 2013). Early-stage patients with  
 343 HNSCC are usually treated using a single modality like surgery or radiotherapy whereas  
 344 advanced-stage patients benefit from multi-modality therapies (Ridge *et al*, 2016). In head  
 345 and neck tumours, identifying patients with tumours *a priori* that may undergo distant  
 346 metastasis or loco-regional recurrence using primary-tumour-derived molecular signature  
 347 will help manage patients better. *CAFE MOCHA* was tested using a robust dataset of 434  
 348 HNSCC tumours from TCGA where data on all four molecular events were available.  
 349 Despite the MR44 being an integrated signature, drawn from 83 metastatic/recurrent  
 350 tumours with four different somatic events (mut, cnv, expr and meth) and two coupled  
 351 events (fmeth and fcncv) available on all the tumours, the discovery sensitivity did not attain  
 352 close to 100% (sensitivity was 79.52%). This means that ~20% of the metastatic/recurrent  
 353 tumours could not be classified using the integrated MR44 signature. This could indicate

354 two possibilities: first, there are other types of tumour-specific changes that need to be  
 355 assayed and accounted for in order to derive a truly complete distant metastasis and  
 356 recurrence-associated signature, and/or, second: the sample size of 83  
 357 metastatic/recurrent tumours was not sufficient (the predictive power of discovery was not  
 358 optimum). The fact that the validation sensitivity of MR44 was 100% in an independent  
 359 cohort does not deter from either of these conclusions as the number of tumours in the  
 360 validation set was small ( $n = 18$ ).

361

362 About half of the genes in the MR44 signature have been reported previously to be  
 363 associated with prognosis, survival, recurrence and distant metastasis for various cancer  
 364 types. For example, *ITGA9* is reported as a tumour suppressor gene in non-small cell lung  
 365 cancer (Pastuszak-Lewandoska *et al*, 2016) and is involved in cell migration and invasion  
 366 in melanoma (Zhang *et al*, 2016). Additionally, epigenetic inactivation of *ITGA9* is linked  
 367 with its expression in nasopharyngeal and breast cancer (Mostovich *et al*, 2011; Nawaz *et al*,  
 368 2015). *NRAS* is linked with survival of patients with liver metastases in colorectal  
 369 cancer (Vauthey *et al*, 2013) and acts as a prognostic factor in metastatic melanoma  
 370 (Jakob *et al*, 2012). The chromosomal region containing *DVL2* gene frequently undergoes  
 371 LOH in patients with colorectal tumours (Kurashina *et al*, 2008). *RPL26A1* expression was  
 372 a prognostic marker in ER-positive breast tumours (Wang & Zhang, 2007) and liver  
 373 metastases in colorectal cancer (Nakamura & Furukawa, 2003). *MORF4L1* was found to  
 374 be one of the candidate genes with copy number reductions in breast cancer (Chen *et al*,  
 375 2007). *FGFR4* profile was observed to be prognostically relevant in squamous cell  
 376 carcinoma of the mouth and oropharynx (Dutra *et al*, 2012), esophagus (Shim *et al*, 2016),  
 377 and gastric cancer (Murase *et al*, 2014). *ANXA11* expression is one of the prognostic  
 378 markers in prostate cancer (Chandran *et al*, 2007; Tsai *et al*, 2013). *ZBTB7A* plays a role  
 379 in suppressing tumour metastasis in gastric cancer (Shi *et al*, 2015). Loss of stromal *CAV1*



380 expression predicts poor survival in colorectal cancer (Zhao *et al*, 2015). *ARHGEF38*  
381 expression significantly differed between high and low recurrence-free survival groups in  
382 prostate cancer (Tandefelt *et al*, 2013). *OXCT1* was shown to act as an oncogene in  
383 human breast cancer cells (Martinez-Outschoorn *et al*, 2012). *RICTOR* regulates cancer  
384 cell metastases in breast cancer cell lines (Zhang *et al*, 2010). *RPAP2* associates with  
385 breast cancer recurrence (Baker *et al*, 2014). miR573 inhibits prostate cancer metastases  
386 (Wang *et al*, 2015). *AIMP1* is down regulated in gastric and colorectal cancer (Kim *et al*,  
387 2014). *FAM134C* is a cancer-relapse marker in breast and ovarian cancer (Guo, 2011).  
388 *LIMS1* (PINCH signalling) has been linked to distant metastasis in pancreatic stromal cells  
389 (Scaife *et al*, 2010). *EGLN1* (commonly referred to as *PHD2*) is an oxygen sensor that  
390 promotes breast cancer metastases (Kuchnio *et al*, 2015). *RPLP2* is one of the 10-gene  
391 prognostic markers for gastric cancer (Zhang *et al*, 2011). *TOLLIP* was found to be  
392 significantly and differentially expressed in colorectal metastatic cells (Barderas *et al*,  
393 2013). *ZNF490* was found to be associated with breast cancer recurrence (Baker *et al*,  
394 2013). MR44 contains genes implicated in MTOR, MAPK and PI3K-AKT signalling  
395 pathways via *DVL2*, *FGF10*, *FGFR4*, *RICTOR*, *ITGA9*, *NRAS* and *CAV1* genes  
396 (Supplementary Table S4).

397 Although the discovery module of *CAFE MOCHA* uses 450k methylation array and  
398 RSEM-normalized RNASeq expression data, the predict module is not restricted to the  
399 assays being performed on the same platform so long as the user provides data in the  
400 same format for a matched normal. Future versions of *CAFE MOCHA* will incorporate  
401 cross-platform converter wherein the user can deposit data generated with multiple  
402 platforms and in multiple formats, thus making the tool truly platform agnostic. Additionally,  
403 *CAFE MOCHA* has the ability to use an underlying tissue-specific normal database,  
404 especially where expression and methylation data is not available, for un-matched normal  
405 samples. However, if data for a matched normal is not available, the user must use the



same assays and formats, used in the discovery module to minimize assay/platform related errors.

## Funding

Research presented in this article is funded by Department of Electronics and Information Technology, Government of India (Ref No:18(4)/2010-E-Infra., 31-03-2010) and Department of IT, BT and ST, Government of Karnataka, India (Ref No:3451-00-090-2-22).

## References

- Agrawal N, Frederick MJ, Pickering CR, Bettgowda C, Chang K, Li RJ, Fakhry C, Xie TX, Zhang J, Wang J, Zhang N, El-Naggar AK, Jasser SA, Weinstein JN, Trevino L, Drummond JA, Muzny DM, Wu Y, Wood LD, Hruban RH, Westra WH, Koch WM, Califano JA, Gibbs RA, Sidransky D, Vogelstein B, Velculescu VE, Papadopoulos N, Wheeler DA, Kinzler KW, Myers JN (2011) Exome sequencing of head and neck squamous cell carcinoma reveals inactivating mutations in NOTCH1. *Science* **333**(6046): 1154-7
- Aryee MJ, Jaffe AE, Corrada-Bravo H, Ladd-Acosta C, Feinberg AP, Hansen KD, Irizarry RA (2014) Minfi: a flexible and comprehensive Bioconductor package for the analysis of Infinium DNA methylation microarrays. *Bioinformatics* **30**(10): 1363-9
- Baker JB, Sinicropi DV, Pelham RJ, Crager M, Collin F, Stephans JC, Liu M, Morlan J, Qu K (2013) Method of predicting breast cancer prognosis.
- Baker JB, Sinicropi DV, Pelham RJ, Crager M, Collin F, Stephans JC, Liu M, Morlan J, Qu K (2014) Method of predicting breast cancer prognosis
- Barderas R, Mendes M, Torres S, Bartolome RA, Lopez-Lucendo M, Villar-Vazquez R, Pelaez-Garcia A, Fuente E, Bonilla F, Casal JI (2013) In-depth characterization of the secretome of colorectal cancer metastatic cells identifies key proteins in cell adhesion, migration, and invasion. *Mol Cell Proteomics* **12**(6): 1602-20
- Breiman L (2001) *Random Forests*. Vol. 45. The Netherlands: Kluwer Academic Publishers
- Cancer Genome Atlas N (2015) Comprehensive genomic characterization of head and neck squamous cell carcinomas. *Nature* **517**(7536): 576-82
- Chandran UR, Ma C, Dhir R, Bisceglia M, Lyons-Weiler M, Liang W, Michalopoulos G, Becich M, Monzon FA (2007) Gene expression profiles of prostate cancer reveal involvement of multiple molecular pathways in the metastatic process. *BMC Cancer* **7**: 64

450 Chen W, Salto-Tellez M, Palanisamy N, Ganesan K, Hou Q, Tan LK, Sii LH, Ito K, Tan B,  
451 Wu J (2007) Targets of genome copy number reduction in primary breast cancers  
452 identified by integrative genomics. *Genes, Chromosomes and Cancer* **46**(3): 288-301  
453

454 Chou CH, Chang NW, Shrestha S, Hsu SD, Lin YL, Lee WH, Yang CD, Hong HC, Wei TY,  
455 Tu SJ, Tsai TR, Ho SY, Jian TY, Wu HY, Chen PR, Lin NC, Huang HT, Yang TL, Pai CY,  
456 Tai CS, Chen WL, Huang CY, Liu CC, Weng SL, Liao KW, Hsu WL, Huang HD (2016)  
457 miRTarBase 2016: updates to the experimentally validated miRNA-target interactions  
458 database. *Nucleic acids research* **44**(D1): D239-47  
459

460 Deng M, Bragelmann J, Schultze JL, Perner S (2016) Web-TCGA: an online platform for  
461 integrated analysis of molecular cancer data sets. *BMC bioinformatics* **17**: 72  
462

463 Dutra RL, de Carvalho MB, Dos Santos M, Mercante AM, Gazito D, de Cicco R, Group G,  
464 Tajara EH, Louro ID, da Silva AM (2012) FGFR4 profile as a prognostic marker in  
465 squamous cell carcinoma of the mouth and oropharynx. *PLoS One* **7**(11): e50747  
466

467 Editorial (2015) The future of cancer genomics. *Nature medicine* **21**(2): 99  
468

469 Ferlay J, Shin HR, Bray F, Forman D, Mathers C, Parkin DM (2010) Estimates of  
470 worldwide burden of cancer in 2008: GLOBOCAN 2008. *International journal of cancer*  
471 *Journal international du cancer* **127**(12): 2893-917  
472

473 Gao BJ. Hyper-rectangle-based discriminative data generalization and applications in data  
474 mining. Ph.D., Hyper-rectangle-based discriminative data generalization and applications  
475 in data mining. Ph.D. Thesis. Simon Fraser University, Canada, 2007  
476

477 Gevaert O, Plevritis S (2013) Identifying master regulators of cancer and their downstream  
478 targets by integrating genomic and epigenomic features. *Pacific Symposium on*  
479 *Biocomputing Pacific Symposium on Biocomputing*: 123-34  
480

481 Goh ST, Rubin C (2014) Box Drawings for Learning with Imbalanced Data *aRxiv [statML]*  
482

483 Gundem G, Perez-Llamas C, Jene-Sanz A, Kedzierska A, Islam A, Deu-Pons J, Furney  
484 SJ, Lopez-Bigas N (2010) IntOGen: integration and data mining of multidimensional  
485 oncogenomic data. *Nature methods* **7**(2): 92-3  
486

487 Guo NL (2011) Gene signature for diagnosis and prognosis of breast cancer and ovarian  
488 cancer: Google Patents. US8030060  
489

490 He Y, Zhang M, Ju Y, Yu Z, Lv D, Sun H, Yuan W, He F, Zhang J, Li H, Li J, Wang-Sattler  
491 R, Li Y, Zhang G, Xie L (2012) dbDEPC 2.0: updated database of differentially expressed  
492 proteins in human cancers. *Nucleic acids research* **40**(Database issue): D964-71  
493

494 Hsu SD, Lin FM, Wu WY, Liang C, Huang WC, Chan WL, Tsai WT, Chen GZ, Lee CJ,  
495 Chiu CM, Chien CH, Wu MC, Huang CY, Tsou AP, Huang HD (2011) miRTarBase: a  
496 database curates experimentally validated microRNA-target interactions. *Nucleic acids*  
497 *research* **39**(Database issue): D163-9  
498

499 Hsu SD, Tseng YT, Shrestha S, Lin YL, Khaleel A, Chou CH, Chu CF, Huang HY, Lin CM,  
500 Ho SY, Jian TY, Lin FM, Chang TH, Weng SL, Liao KW, Liao IE, Liu CC, Huang HD  
501 (2014) miRTarBase update 2014: an information resource for experimentally validated

502 miRNA-target interactions. *Nucleic acids research* **42**(Database issue): D78-85  
503  
504 Huang WY, Hsu SD, Huang HY, Sun YM, Chou CH, Weng SL, Huang HD (2015) MethHC:  
505 a database of DNA methylation and gene expression in human cancer. *Nucleic acids*  
506 *research* **43**(Database issue): D856-61  
507  
508 Hudson TJ, Anderson W, Artez A, Barker AD, Bell C, Bernabe RR, Bhan MK, Calvo F,  
509 Eerola I, Gerhard DS, Guttmacher A, Guyer M, Hemsley FM, Jennings JL, Kerr D, Klatt P,  
510 Kolar P, Kusada J, Lane DP, Laplace F, Youyong L, Nettekoven G, Ozenberger B,  
511 Peterson J, Rao TS, Remacle J, Schafer AJ, Shibata T, Stratton MR, Vockley JG,  
512 Watanabe K, Yang H, Yuen MM, Knoppers BM, Bobrow M, Cambon-Thomsen A, Dressler  
513 LG, Dyke SO, Joly Y, Kato K, Kennedy KL, Nicolas P, Parker MJ, Rial-Sebbag E, Romeo-  
514 Casabona CM, Shaw KM, Wallace S, Wiesner GL, Zeps N, Lichter P, Biankin AV,  
515 Chabannon C, Chin L, Clement B, de Alava E, Degos F, Ferguson ML, Geary P, Hayes  
516 DN, Hudson TJ, Johns AL, Kasprzyk A, Nakagawa H, Penny R, Piris MA, Sarin R, Scarpa  
517 A, Shibata T, van de Vijver M, Futreal PA, Aburatani H, Bayes M, Botwell DD, Campbell  
518 PJ, Estivill X, Gerhard DS, Grimmond SM, Gut I, Hirst M, Lopez-Otin C, Majumder P,  
519 Marra M, McPherson JD, Nakagawa H, Ning Z, Puente XS, Ruan Y, Shibata T, Stratton  
520 MR, Stunnenberg HG, Swerdlow H, Velculescu VE, Wilson RK, Xue HH, Yang L,  
521 Spellman PT, Bader GD, Boutros PC, Campbell PJ, Flicek P, Getz G, Guigo R, Guo G,  
522 Haussler D, Heath S, Hubbard TJ, Jiang T, Jones SM, Li Q, Lopez-Bigas N, Luo R,  
523 Muthuswamy L, Ouellette BF, Pearson JV, Puente XS, Quesada V, Raphael BJ, Sander  
524 C, Shibata T, Speed TP, Stein LD, Stuart JM, Teague JW, Totoki Y, Tsunoda T, Valencia  
525 A, Wheeler DA, Wu H, Zhao S, Zhou G, Stein LD, Guigo R, Hubbard TJ, Joly Y, Jones  
526 SM, Kasprzyk A, Lathrop M, Lopez-Bigas N, Ouellette BF, Spellman PT, Teague JW,  
527 Thomas G, Valencia A, Yoshida T, Kennedy KL, Axton M, Dyke SO, Futreal PA, Gerhard  
528 DS, Gunter C, Guyer M, Hudson TJ, McPherson JD, Miller LJ, Ozenberger B, Shaw KM,  
529 Kasprzyk A, Stein LD, Zhang J, Haider SA, Wang J, Yung CK, Cros A, Liang Y,  
530 Gnaneshan S, Guberman J, Hsu J, Bobrow M, Chalmers DR, Hasel KW, Joly Y, Kaan TS,  
531 Kennedy KL, Knoppers BM, Lowrance WW, Masui T, Nicolas P, Rial-Sebbag E, Rodriguez  
532 LL, Vergely C, Yoshida T, Grimmond SM, Biankin AV, Bowtell DD, Cloonan N, deFazio A,  
533 Eshleman JR, Etemadmoghadam D, Gardiner BB, Kench JG, Scarpa A, Sutherland RL,  
534 Tempero MA, Waddell NJ, Wilson PJ, McPherson JD, Gallinger S, Tsao MS, Shaw PA,  
535 Petersen GM, Mukhopadhyay D, Chin L, DePinho RA, Thayer S, Muthuswamy L, Shazand  
536 K, Beck T, Sam M, Timms L, Ballin V, Lu Y, Ji J, Zhang X, Chen F, Hu X, Zhou G, Yang Q,  
537 Tian G, Zhang L, Xing X, Li X, Zhu Z, Yu Y, Yu J, Yang H, Lathrop M, Tost J, Brennan P,  
538 Holcatova I, Zaridze D, Brazma A, Egevard L, Prokhortchouk E, Banks RE, Uhlen M,  
539 Cambon-Thomsen A, Viksna J, Ponten F, Skryabin K, Stratton MR, Futreal PA, Birney E,  
540 Borg A, Borresen-Dale AL, Caldas C, Foekens JA, Martin S, Reis-Filho JS, Richardson  
541 AL, Sotiriou C, Stunnenberg HG, Thoms G, van de Vijver M, van't Veer L, Calvo F,  
542 Birnbaum D, Blanche H, Boucher P, Boyault S, Chabannon C, Gut I, Masson-Jacquemier  
543 JD, Lathrop M, Pauporte I, Pivot X, Vincent-Salomon A, Tabone E, Theillet C, Thomas G,  
544 Tost J, Treilleux I, Calvo F, Bioulac-Sage P, Clement B, Decaens T, Degos F, Franco D,  
545 Gut I, Gut M, Heath S, Lathrop M, Samuel D, Thomas G, Zucman-Rossi J, Lichter P, Eils  
546 R, Brors B, Korbel JO, Korshunov A, Landgraf P, Lehrach H, Pfister S, Radlwimmer B,  
547 Reifemberger G, Taylor MD, von Kalle C, Majumder PP, Sarin R, Rao TS, Bhan MK,  
548 Scarpa A, Pederzoli P, Lawlor RA, Delledonne M, Bardelli A, Biankin AV, Grimmond SM,  
549 Gress T, Klimstra D, Zamboni G, Shibata T, Nakamura Y, Nakagawa H, Kusada J,  
550 Tsunoda T, Miyano S, Aburatani H, Kato K, Fujimoto A, Yoshida T, Campo E, Lopez-Otin  
551 C, Estivill X, Guigo R, de Sanjose S, Piris MA, Montserrat E, Gonzalez-Diaz M, Puente  
552 XS, Jares P, Valencia A, Himmelbauer H, Quesada V, Bea S, Stratton MR, Futreal PA,  
553 Campbell PJ, Vincent-Salomon A, Richardson AL, Reis-Filho JS, van de Vijver M, Thomas

G, Masson-Jacquemier JD, Aparicio S, Borg A, Borresen-Dale AL, Caldas C, Foekens JA, Stunnenberg HG, van't Veer L, Easton DF, Spellman PT, Martin S, Barker AD, Chin L, Collins FS, Compton CC, Ferguson ML, Gerhard DS, Getz G, Gunter C, Guttmacher A, Guyer M, Hayes DN, Lander ES, Ozenberger B, Penny R, Peterson J, Sander C, Shaw KM, Speed TP, Spellman PT, Vockley JG, Wheeler DA, Wilson RK, Hudson TJ, Chin L, Knoppers BM, Lander ES, Lichter P, Stein LD, Stratton MR, Anderson W, Barker AD, Bell C, Bobrow M, Burke W, Collins FS, Compton CC, DePinho RA, Easton DF, Futreal PA, Gerhard DS, Green AR, Guyer M, Hamilton SR, Hubbard TJ, Kallioniemi OP, Kennedy KL, Ley TJ, Liu ET, Lu Y, Majumder P, Marra M, Ozenberger B, Peterson J, Schafer AJ, Spellman PT, Stunnenberg HG, Wainwright BJ, Wilson RK, Yang H (2010) International network of cancer genome projects. *Nature* **464**(7291): 993-8

India Project Team of the International Cancer Genome C (2013) Mutational landscape of gingivo-buccal oral squamous cell carcinoma reveals new recurrently-mutated genes and molecular subgroups. *Nature communications* **4**: 2873

Iwamoto T, Pusztai L (2010) Predicting prognosis of breast cancer with gene signatures: are we lost in a sea of data? *Genome medicine* **2**(11): 81

Jakob JA, Bassett RL, Jr., Ng CS, Curry JL, Joseph RW, Alvarado GC, Rohlf ML, Richard J, Gershenwald JE, Kim KB, Lazar AJ, Hwu P, Davies MA (2012) NRAS mutation status is an independent prognostic factor in metastatic melanoma. *Cancer* **118**(16): 4014-23

Kanehisa M, Goto S, Kawashima S, Nakaya A (2002) The KEGG databases at GenomeNet. *Nucleic acids research* **30**(1): 42-6

Kanehisa M, Goto S, Kawashima S, Okuno Y, Hattori M (2004) The KEGG resource for deciphering the genome. *Nucleic acids research* **32**(Database issue): D277-80

Kanehisa M, Goto S, Sato Y, Furumichi M, Tanabe M (2012) KEGG for integration and interpretation of large-scale molecular data sets. *Nucleic acids research* **40**(1): D109-14

Kim MS, Kim S, Myung H (2014) Degradation of AIMP1/p43 induced by hepatitis C virus E2 leads to upregulation of TGF-beta signaling and increase in surface expression of gp96. *PLoS One* **9**(5): e96302

kirmse M, Petersohn U (2011) Large margin rectangle learning an alternative way to learn interpretable and representative models. In *International Conference of Soft Computing and Pattern Recognition (SoCPaR)* pp 161-166: IEEE

Krishnan N, Gupta S, Palve V, Varghese L, Pattnaik S, Jain P, Khyriem C, Hariharan A, Dhas K, Nair J, Pareek M, Prasad V, Siddappa G, Suresh A, Kekatpure V, Kuriakose M, Panda B (2015) Integrated analysis of oral tongue squamous cell carcinoma identifies key variants and pathways linked to risk habits, HPV, clinical parameters and tumor recurrence. *F1000Res* **4**: 1215

Krishnan NM, Dhas K, Nair J, Palve V, Bagwan J, Siddappa G, Suresh A, Kekatpure VD, Kuriakose MA, Panda B (2016) A Minimal DNA Methylation Signature in Oral Tongue Squamous Cell Carcinoma Links Altered Methylation with Tumor Attributes. *Mol Cancer Res* **14**(9): 805-19

Kuchnio A, Dewerchin M, Carmeliet P (2015) The PHD2 oxygen sensor paves the way to



metastasis. *Oncotarget* **6**(34): 35149-50

Kurashina K, Yamashita Y, Ueno T, Koinuma K, Ohashi J, Horie H, Miyakura Y, Hamada T, Haruta H, Hatanaka H, Soda M, Choi YL, Takada S, Yasuda Y, Nagai H, Mano H (2008) Chromosome copy number analysis in screening for prognosis-related genomic regions in colorectal carcinoma. *Cancer Sci* **99**(9): 1835-40

Li B, Dewey CN (2011) RSEM: accurate transcript quantification from RNA-Seq data with or without a reference genome. *BMC bioinformatics* **12**: 323

Martinez-Outschoorn UE, Lin Z, Whitaker-Menezes D, Howell A, Sotgia F, Lisanti MP (2012) Ketone body utilization drives tumor growth and metastasis. *Cell Cycle* **11**(21): 3964-71

Mishra A, Meherotra R (2014) Head and neck cancer: global burden and regional trends in India. *Asian Pacific journal of cancer prevention : APJCP* **15**(2): 537-50

Mosca E, Alfieri R, Merelli I, Viti F, Calabria A, Milanesi L (2010) A multilevel data integration resource for breast cancer study. *BMC systems biology* **4**: 76

Mostovich LA, Prudnikova TY, Kondratov AG, Loginova D, Vavilov PV, Rykova VI, Sidorov SV, Pavlova TV, Kashuba VI, Zabarovskiy ER, Grigorieva EV (2011) Integrin alpha9 (ITGA9) expression and epigenetic silencing in human breast tumors. *Cell Adh Migr* **5**(5): 395-401

Murase H, Inokuchi M, Takagi Y, Kato K, Kojima K, Sugihara K (2014) Prognostic significance of the co-overexpression of fibroblast growth factor receptors 1, 2 and 4 in gastric cancer. *Mol Clin Oncol* **2**(4): 509-517

Nakamura Y, Furukawa Y (2003) Method for treating or preventing metastasis of colorectal cancers: Google Patents. US20060111314

Nawaz I, Hu LF, Du ZM, Moumad K, Ignatyev I, Pavlova TV, Kashuba V, Almgren M, Zabarovskiy ER, Ernberg I (2015) Integrin alpha9 gene promoter is hypermethylated and downregulated in nasopharyngeal carcinoma. *Oncotarget* **6**(31): 31493-507

Netanel D, Avraham A, Ben-Baruch A, Evron E, Shamir R (2016) Expression and methylation patterns partition luminal-A breast tumors into distinct prognostic subgroups. *Breast cancer research : BCR* **18**(1): 74

Pastuszak-Lewandoska D, Kordiak J, Antczak A, Migdalska-Sek M, Czarnecka KH, Gorski P, Nawrot E, Kiszalkiewicz JM, Domanska-Senderowska D, Brzezianska-Lasota E (2016) Expression level and methylation status of three tumor suppressor genes, DLEC1, ITGA9 and MLH1, in non-small cell lung cancer. *Med Oncol* **33**(7): 75

Pickering CR, Zhang J, Yoo SY, Bengtsson L, Moorthy S, Neskey DM, Zhao M, Ortega Alves MV, Chang K, Drummond J, Cortez E, Xie TX, Zhang D, Chung W, Issa JP, Zweidler-McKay PA, Wu X, El-Naggar AK, Weinstein JN, Wang J, Muzny DM, Gibbs RA, Wheeler DA, Myers JN, Frederick MJ (2013) Integrative genomic characterization of oral squamous cell carcinoma identifies frequent somatic drivers. *Cancer discovery* **3**(7): 770-81

658 Pidsley R, CC YW, Volta M, Lunnon K, Mill J, Schalkwyk LC (2013) A data-driven  
659 approach to preprocessing Illumina 450K methylation array data. *BMC genomics* **14**: 293  
660

661 Richards JA (2013) *Remote Sensing Digital Image Analysis: An Introduction*: Springer  
662 Science & Business Media  
663

664 Ridge JA, Mehra R, Lango MN, Galloway T (2016) Head and neck tumors. In *Cancer  
665 management: a multidisciplinary approach.*, Haller DG, Wagman LD, Camphausen KA,  
666 Hoskins WJ (eds), Chapter 2.  
667

668 Scaife CL, Shea J, Emerson L, Boucher K, Firpo MA, Beckerle MC, Mulvihill SJ (2010)  
669 Prognostic significance of PINCH signalling in human pancreatic ductal adenocarcinoma.  
670 *HPB (Oxford)* **12**(5): 352-8  
671

672 Shi DB, Wang YW, Xing AY, Gao JW, Zhang H, Guo XY, Gao P (2015) C/EBPalpha-  
673 induced miR-100 expression suppresses tumor metastasis and growth by targeting  
674 ZBTB7A in gastric cancer. *Cancer Lett* **369**(2): 376-85  
675

676 Shim HJ, Shin MH, Kim HN, Kim JH, Hwang JE, Bae WK, Chung IJ, Cho SH (2016) The  
677 Prognostic Significance of FGFR4 Gly388 Polymorphism in Esophageal Squamous Cell  
678 Carcinoma after Concurrent Chemoradiotherapy. *Cancer Res Treat* **48**(1): 71-9  
679

680 Tandefelt DG, Boormans JL, van der Korput HA, Jenster GW, Trapman J (2013) A 36-  
681 gene signature predicts clinical progression in a subgroup of ERG-positive prostate  
682 cancers. *European urology* **64**(6): 941-950  
683

684 Thingholm LB, Andersen L, Makalic E, Southey MC, Thomassen M, Hansen LL (2016)  
685 Strategies for Integrated Analysis of Genetic, Epigenetic, and Gene Expression Variation  
686 in Cancer: Addressing the Challenges. *Frontiers in genetics* **7**: 2  
687

688 Tsai K-CK, Chi-Rong L, SU J-MJ (2013) Molecular markers for prognostically predicting  
689 prostate cancer, method and kit thereof: Google Patents. US20130331281  
690

691 Uhlen M, Fagerberg L, Hallstrom BM, Lindskog C, Oksvold P, Mardinoglu A, Sivertsson A,  
692 Kampf C, Sjostedt E, Asplund A, Olsson I, Edlund K, Lundberg E, Navani S, Szigartyo CA,  
693 Odeberg J, Djureinovic D, Takanen JO, Hober S, Alm T, Edqvist PH, Berling H, Tegel H,  
694 Mulder J, Rockberg J, Nilsson P, Schwenk JM, Hamsten M, von Feilitzen K, Forsberg M,  
695 Persson L, Johansson F, Zwahlen M, von Heijne G, Nielsen J, Ponten F (2015)  
696 Proteomics. Tissue-based map of the human proteome. *Science* **347**(6220): 1260419  
697

698 Vauthey JN, Zimmitti G, Kopetz SE, Shindoh J, Chen SS, Andreou A, Curley SA, Aloia TA,  
699 Maru DM (2013) RAS mutation status predicts survival and patterns of recurrence in  
700 patients undergoing hepatectomy for colorectal liver metastases. *Ann Surg* **258**(4): 619-  
701 26; discussion 626-7  
702

703 Wang L, Song G, Tan W, Qi M, Zhang L, Chan J, Yu J, Han J, Han B (2015) MiR-573  
704 inhibits prostate cancer metastasis by regulating epithelial-mesenchymal transition.  
705 *Oncotarget* **6**(34): 35978-90  
706

707 Wang Y, Zhang Y (2007) Methods of predicting distant metastasis of lymph node-negative  
708 primary breast cancer using biological pathway gene expression analysis: Google Patents.  
709 US20080182246

710  
711  
712  
713  
714  
715  
716  
717  
718  
719  
720  
721  
722  
723  
724  
725  
726  
727  
728  
729  
730  
731  
732

Weinstein JN, Collisson EA, Mills GB, Shaw KR, Ozenberger BA, Ellrott K, Shmulevich I, Sander C, Stuart JM (2013) The Cancer Genome Atlas Pan-Cancer analysis project. *Nature genetics* **45**(10): 1113-20

Zhang F, Zhang X, Li M, Chen P, Zhang B, Guo H, Cao W, Wei X, Cao X, Hao X, Zhang N (2010) mTOR complex component Rictor interacts with PKCzeta and regulates cancer cell metastasis. *Cancer Res* **70**(22): 9360-70

Zhang J, Na S, Liu C, Pan S, Cai J, Qiu J (2016) MicroRNA-125b suppresses the epithelial-mesenchymal transition and cell invasion by targeting ITGA9 in melanoma. *Tumour Biol* **37**(5): 5941-9

Zhang YZ, Zhang LH, Gao Y, Li CH, Jia SQ, Liu N, Cheng F, Niu DY, Cho WC, Ji JF, Zeng CQ (2011) Discovery and validation of prognostic markers in gastric cancer by genome-wide expression profiling. *World J Gastroenterol* **17**(13): 1710-7

Zhao Z, Han FH, Yang SB, Hua LX, Wu JH, Zhan WH (2015) Loss of stromal caveolin-1 expression in colorectal cancer predicts poor survival. *World J Gastroenterol* **21**(4): 1140-7

733

734 **Table 1:** Sample cohorts used in the discovery and validation modules of *CAFE MOCHA*

735 for discovering metastatic/recurrent signature MR44 in head and neck squamous cell

736 carcinoma (HNSCC).

737

|            |                                      |                                                                                                                                                                                    |                                                                    |
|------------|--------------------------------------|------------------------------------------------------------------------------------------------------------------------------------------------------------------------------------|--------------------------------------------------------------------|
| Discovery  |                                      |                                                                                                                                                                                    |                                                                    |
| Stage 1    | Source                               | TCGA HNSCC ( <a href="http://tinyurl.com/jhmg9b9">http://tinyurl.com/jhmg9b9</a> ), data available on all the 4 event types (mut, CNV, exp, meth) on tumor:matched normal samples. |                                                                    |
|            | Total Number of tumors               | 434                                                                                                                                                                                |                                                                    |
|            | Metastatic/Recurrent                 | 83                                                                                                                                                                                 |                                                                    |
|            | Tumors without metastasis/recurrence | 351                                                                                                                                                                                |                                                                    |
| Stage 2    | Source                               | Data on at least one event type available from the same matched tumor:normal sample.                                                                                               |                                                                    |
|            |                                      | TCGA HNSCC                                                                                                                                                                         | OTSCC (Krishnan <i>et al</i> , 2015; Krishnan <i>et al</i> , 2016) |
|            | Total number of tumors               | 42                                                                                                                                                                                 | 37                                                                 |
|            | Metastatic/Recurrent                 | 4                                                                                                                                                                                  | 15                                                                 |
|            | Tumors without metastasis/recurrence | 38                                                                                                                                                                                 | 22                                                                 |
|            | Adjacent normal tissue               | 0                                                                                                                                                                                  | 37                                                                 |
| Validation |                                      |                                                                                                                                                                                    |                                                                    |
|            | Source                               | OTSCC (Krishnan <i>et al</i> , 2015; Krishnan <i>et al</i> , 2016) (matched tumor:normal data on all event types from the same tumors)                                             |                                                                    |
|            | Total number of tumors               | 18                                                                                                                                                                                 |                                                                    |
|            | Metastatic/Recurrent                 | 3                                                                                                                                                                                  |                                                                    |
|            | Tumors without metastasis/recurrence | 15                                                                                                                                                                                 |                                                                    |
|            | Adjacent normal tissue               | 18                                                                                                                                                                                 |                                                                    |

738

739

740



741

742

## 743 **Figure Legends**

744 Figure 1: *CAFE MOCHA* application workflow and graphical-user-interface. A. Discovery,  
745 and Prediction modules. B. Integrated analyses.

746

747 Figure 2: Complete specificity margin based clustering (CSMBC) algorithm for quantitative  
748 and coupled events.

749 Clustering of quantitative and coupled events, for three clinical sub-categories  $i$ ,  $j$  and  $k$  is  
750 demonstrated here. Panel A: linking of quantitative events such as expression or  
751 methylation to clinical sub-categories  $i$ ,  $j$  and  $k$  (shades of blue). Boundaries are  
752 determined in a supervised manner, as the minimum and maximum limits of the  
753 quantitative ranges for each clinical sub-category. Overlaps are estimated as per the  
754 equations illustrated in the figure. Samples whose expression or methylation values lie  
755 outside the regions of overlap, 100% specific to a clinical sub-category are factored in  
756 towards the sensitivity of that gene for that clinical sub-category. Panel B: clinical linking of  
757 coupled events such as *fmeth* (shades of orange) resulting from a combination of two  
758 quantitative events (*expr* – shades of blue and *meth* – shades of purple). The expression  
759 event is mapped along the first dimension and the methylation event is mapped along the  
760 second, and the samples, which observe both, expression and methylation, boundaries,  
761 contribute to the sensitivity of that *fmeth* event for that clinical sub-category. Panel C:  
762 clinical linking of coupled events such as *fcnv* (shades of dark orange) resulting from a  
763 combination of one quantitative event (expression – shades of blue) and another  
764 categorical event (CNV – shades of green). Here, the *fcnv* event linked to a clinical sub-  
765 category is determined by both, expression boundaries for a clinical sub-group, and  
766 presence of CNVs for the same samples in that clinical sub-group.

767

768 Figure 3: Discovery heatmap (A) and per-event validation sensitivity (B) of 44-gene  
769 integrated signature (MR44) for distant metastasis and recurrence in the HNSCC  
770 discovery set.

771 An integrated signature associated with metastasis/recurrence was derived from  
772 combining six event types (mut: red, fmeth: dark orange, fcnv: orange, cnv: green, expr:  
773 blue and meth: purple). Cumulative sample frequency (%) for individual event types is  
774 represented as a histogram. The per-event validation sensitivity is represented as bubbles,  
775 where the bubble size is proportional to the sample frequency of that event in the  
776 validation cohort.

777

778 Figure 4: Comparison of detection sensitivities and total numbers of events required  
779 achieving the sensitivity in one (A), two (B), three (C), four (D), five (E) and all six (F) event  
780 types. Utilizing all the six events (F) shows the power of integration both on sensitivity of  
781 detection (black dot) and the number of events (colored bars for all the six individual event  
782 types) required to attain the sensitivity.

783

## 784 **Supplementary Data Legend**

785 Supplementary Table S1: TCGA HNSCC tumor samples ( $n = 434$ ) and clinical attributes  
786 used for the discovery of MR44.

787

788 Supplementary Table S2: Oral tongue squamous cell carcinoma (OTSCC) and TCGA  
789 HNSCC samples lacking cross-platform overlap, and their clinical attributes used for  
790 confirmation of MR44 discovery.

791

792 Supplementary Table S3: Oral tongue squamous cell carcinoma (OTSCC) ( $n = 18$ ) with all

793 four events assayed within the same tumor, and their clinical attributes used for the  
794 validation.

795 Supplementary Table S4: Discovered events associated with Metastases and Recurrence  
796 in HNSCC, pathways mapped, confirmation and validation status.

797

798 Supplementary Figure S1: Events associated with distant metastasis and recurrence in  
799 HNSCC with single-event or multi-event signatures, selected in individual event type (mut:  
800 red, fmeth: d orange, fcnv: orange, cnv: green, expr: blue and meth: purple) and various  
801 integrated analyses, combining different numbers of event types.

802

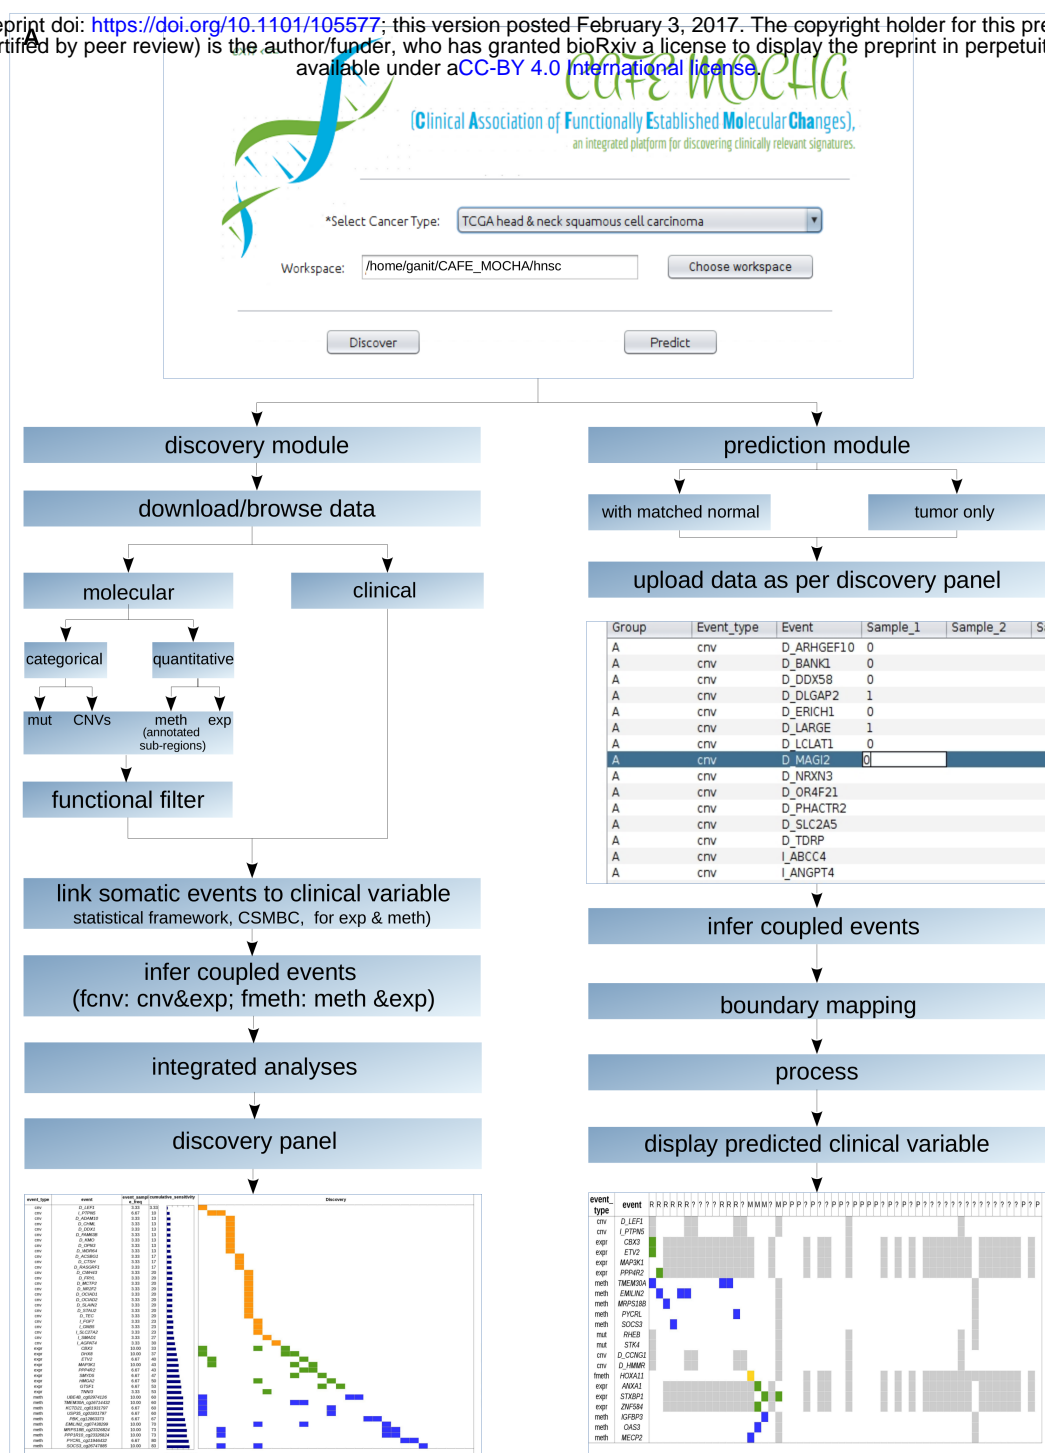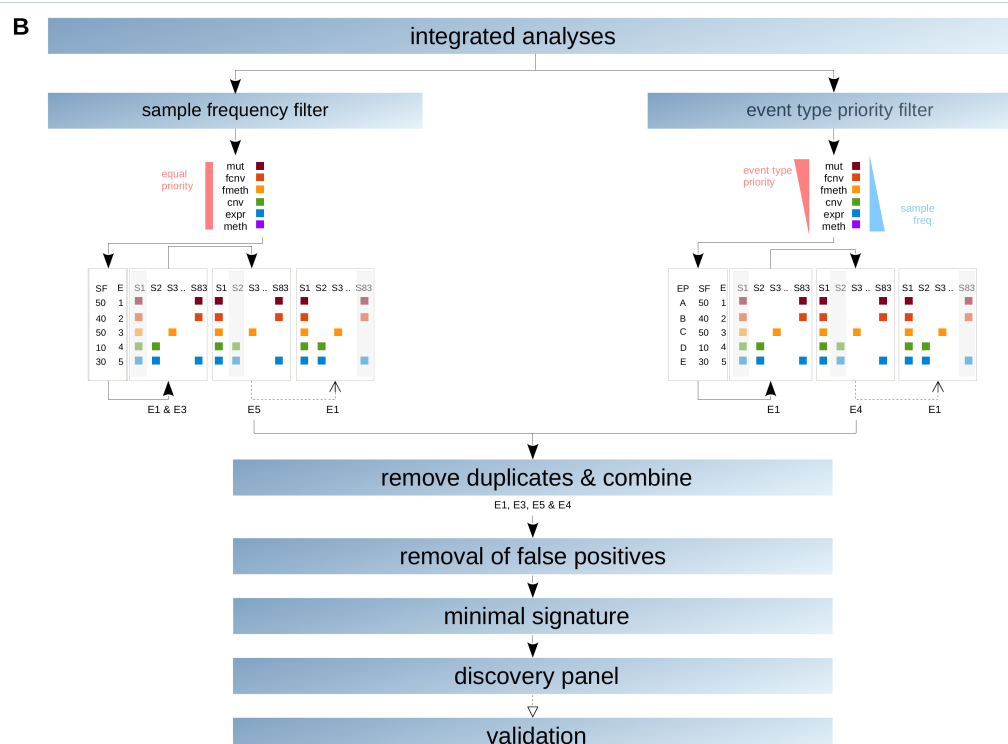

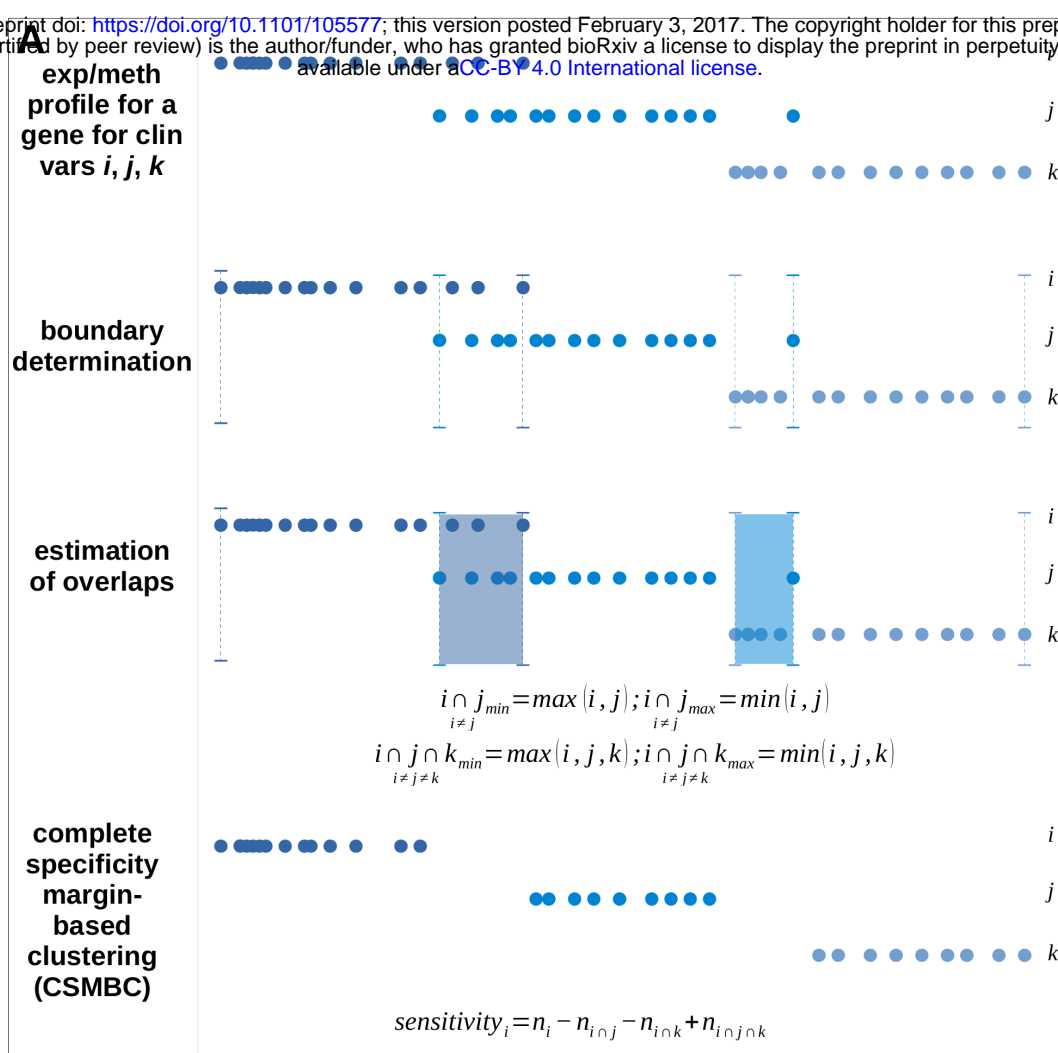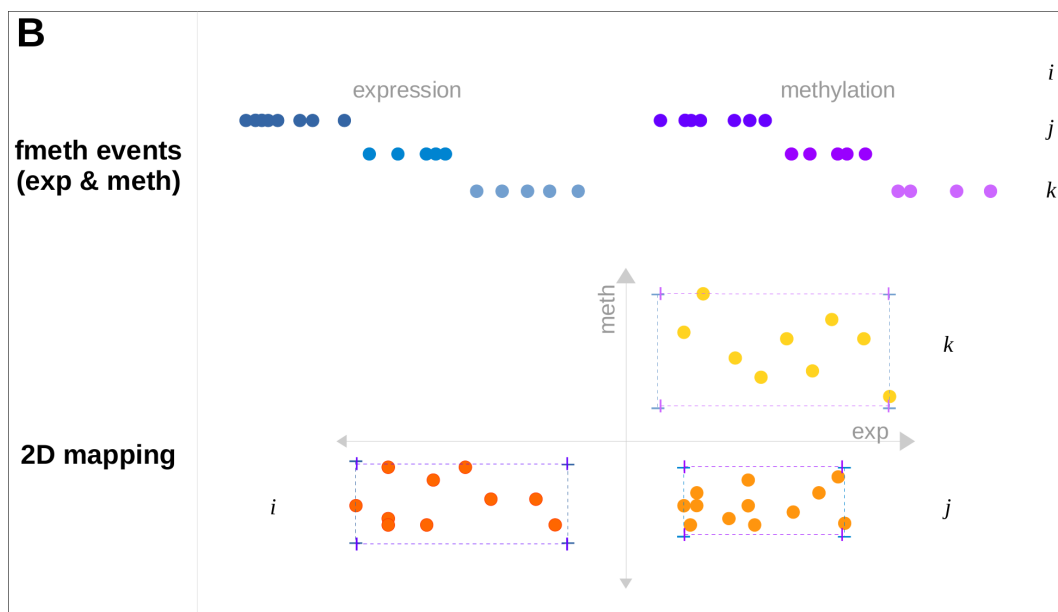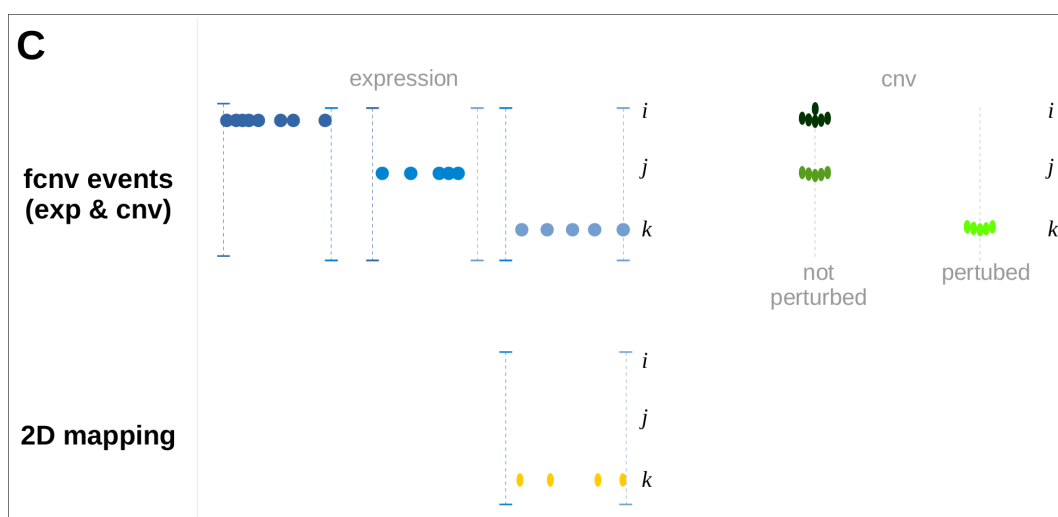

A

B

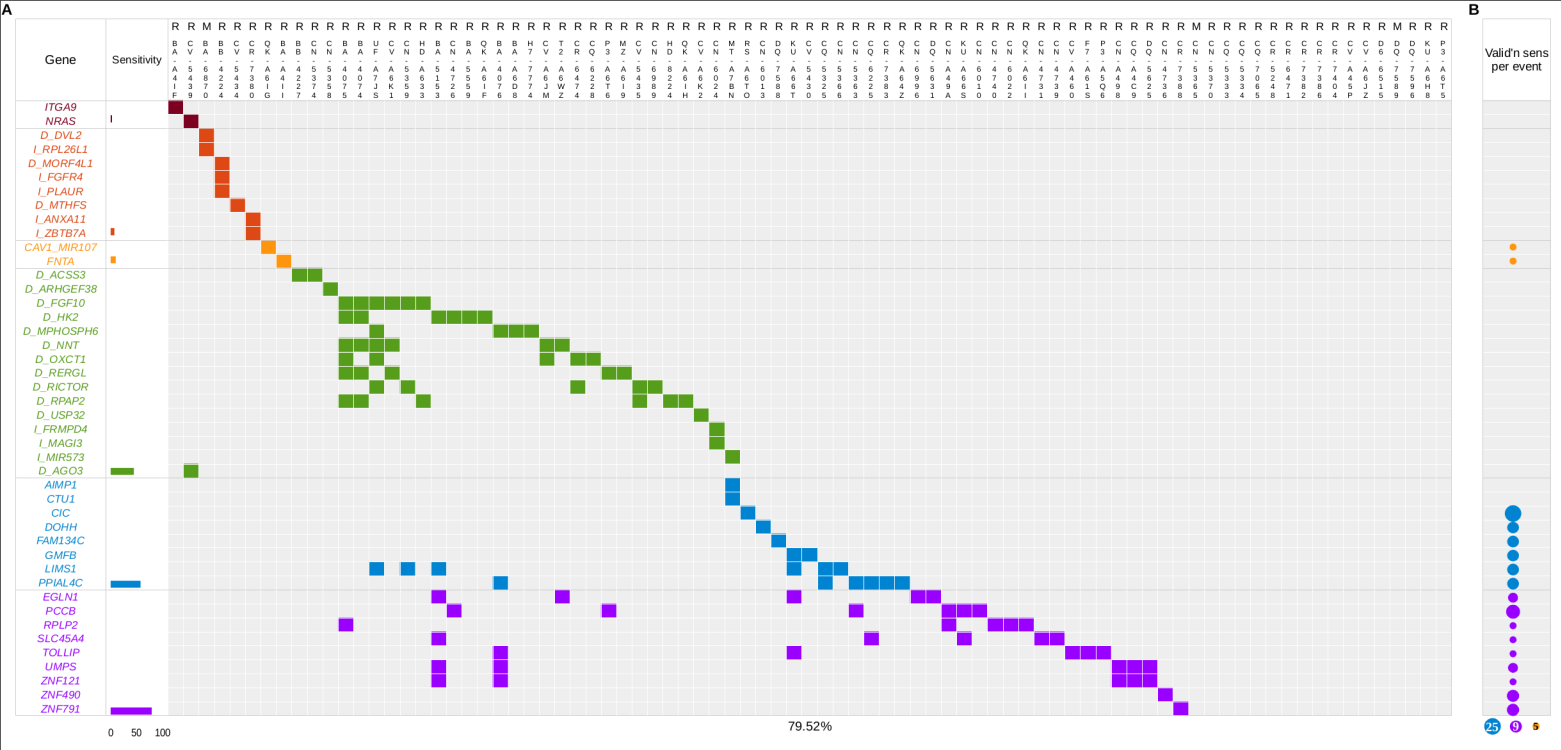

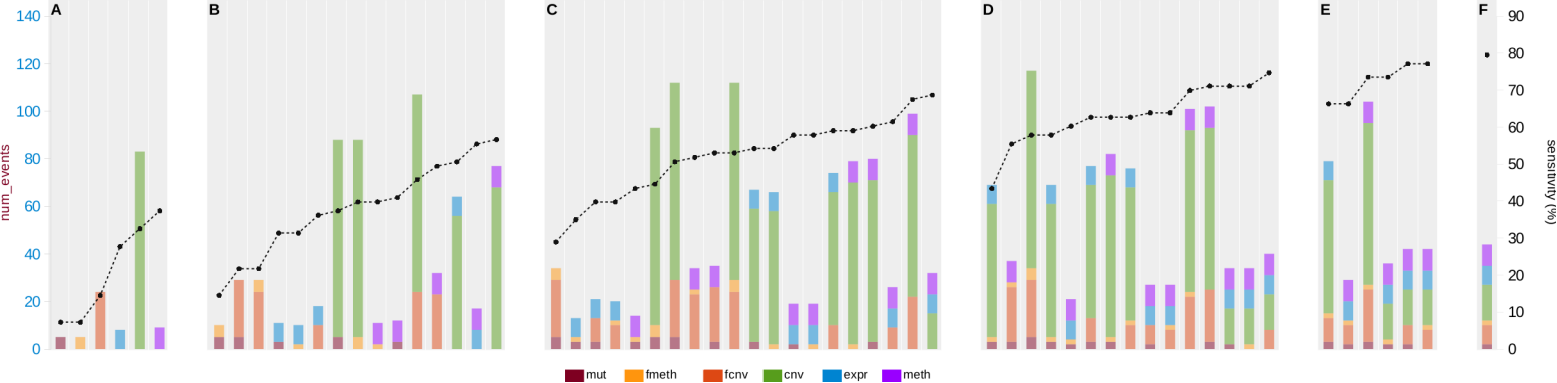

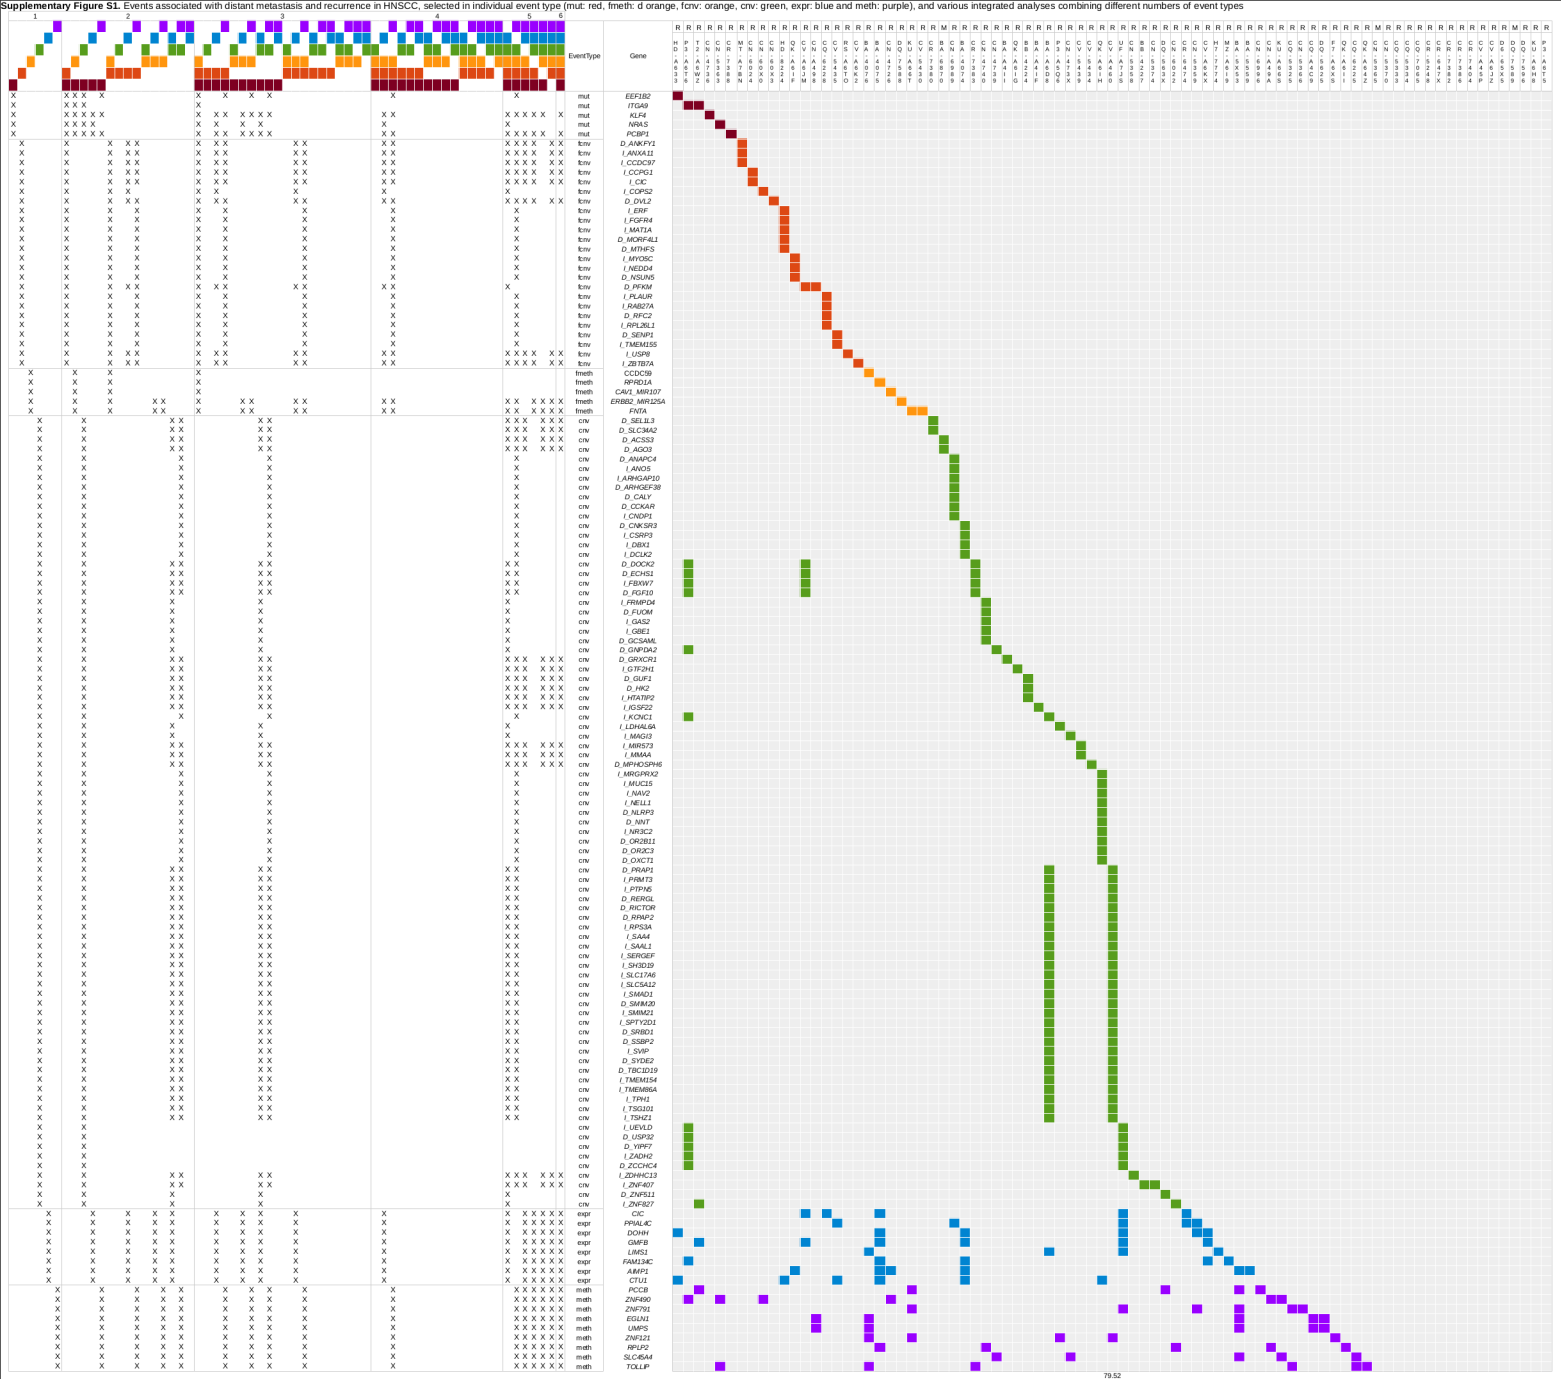



**Supplementary Table S1:** TCGA HNSCC samples and clinical attributes used for discovery.

| SampleID        | R (Loco-regional recurrence); M1(metastasis); M0 (Non-metastatic/Non-recurrent) tumors; N (Solid Tissue Normals). |
|-----------------|-------------------------------------------------------------------------------------------------------------------|
| TCGA-BA-4074-01 | R                                                                                                                 |
| TCGA-BA-4075-01 | R                                                                                                                 |
| TCGA-BA-4076-01 | R                                                                                                                 |
| TCGA-BA-4077-01 | M0                                                                                                                |
| TCGA-BA-4078-01 | M0                                                                                                                |
| TCGA-BA-5149-01 | M0                                                                                                                |
| TCGA-BA-5151-01 | M0                                                                                                                |
| TCGA-BA-5152-01 | M0                                                                                                                |
| TCGA-BA-5153-01 | R                                                                                                                 |
| TCGA-BA-5555-01 | M0                                                                                                                |
| TCGA-BA-5556-01 | M0                                                                                                                |
| TCGA-BA-5557-01 | M0                                                                                                                |
| TCGA-BA-5558-01 | M0                                                                                                                |
| TCGA-BA-5559-01 | R                                                                                                                 |
| TCGA-BA-6868-01 | M0                                                                                                                |
| TCGA-BA-6869-01 | M0                                                                                                                |
| TCGA-BA-6870-01 | M1                                                                                                                |
| TCGA-BA-6871-01 | M0                                                                                                                |
| TCGA-BA-6872-01 | M0                                                                                                                |
| TCGA-BA-6873-01 | M0                                                                                                                |
| TCGA-BA-7269-01 | M0                                                                                                                |
| TCGA-BA-A4IF-01 | R                                                                                                                 |
| TCGA-BA-A4IH-01 | M0                                                                                                                |

|                 |    |
|-----------------|----|
| TCGA-BA-A4II-01 | R  |
| TCGA-BA-A6D8-01 | R  |
| TCGA-BA-A6DA-01 | M0 |
| TCGA-BA-A6DB-01 | M0 |
| TCGA-BA-A6DD-01 | M0 |
| TCGA-BA-A6DE-01 | M0 |
| TCGA-BA-A6DI-01 | M0 |
| TCGA-BA-A6DJ-01 | M0 |
| TCGA-BA-A6DL-01 | M0 |
| TCGA-BB-4217-01 | M0 |
| TCGA-BB-4223-01 | M0 |
| TCGA-BB-4224-01 | R  |
| TCGA-BB-4225-01 | M0 |
| TCGA-BB-4227-01 | R  |
| TCGA-BB-4228-01 | M0 |
| TCGA-BB-7861-01 | M0 |
| TCGA-BB-7862-01 | M0 |
| TCGA-BB-7863-01 | M0 |
| TCGA-BB-7864-01 | M0 |
| TCGA-BB-7870-01 | M0 |
| TCGA-BB-7871-01 | M0 |
| TCGA-BB-7872-01 | M0 |
| TCGA-C9-A47Z-01 | M0 |
| TCGA-C9-A480-01 | M0 |
| TCGA-CN-4723-01 | M0 |
| TCGA-CN-4725-01 | M0 |
| TCGA-CN-4726-01 | R  |

|                 |    |
|-----------------|----|
| TCGA-CN-4727-01 | M0 |
| TCGA-CN-4728-01 | M0 |
| TCGA-CN-4729-01 | M0 |
| TCGA-CN-4730-01 | M0 |
| TCGA-CN-4731-01 | R  |
| TCGA-CN-4733-01 | M0 |
| TCGA-CN-4735-01 | M0 |
| TCGA-CN-4736-01 | R  |
| TCGA-CN-4737-01 | M0 |
| TCGA-CN-4738-01 | M0 |
| TCGA-CN-4739-01 | R  |
| TCGA-CN-4740-01 | R  |
| TCGA-CN-4741-01 | M0 |
| TCGA-CN-4742-01 | M0 |
| TCGA-CN-5355-01 | M0 |
| TCGA-CN-5356-01 | M0 |
| TCGA-CN-5358-01 | R  |
| TCGA-CN-5359-01 | R  |
| TCGA-CN-5360-01 | M0 |
| TCGA-CN-5363-01 | R  |
| TCGA-CN-5364-01 | M0 |
| TCGA-CN-5365-01 | M1 |
| TCGA-CN-5366-01 | R  |
| TCGA-CN-5367-01 | M0 |
| TCGA-CN-5369-01 | M0 |
| TCGA-CN-5370-01 | R  |
| TCGA-CN-5373-01 | M0 |

|                 |    |
|-----------------|----|
| TCGA-CN-5374-01 | R  |
| TCGA-CN-6010-01 | R  |
| TCGA-CN-6011-01 | M0 |
| TCGA-CN-6012-01 | M0 |
| TCGA-CN-6013-01 | R  |
| TCGA-CN-6016-01 | M0 |
| TCGA-CN-6017-01 | M0 |
| TCGA-CN-6018-01 | M0 |
| TCGA-CN-6019-01 | M0 |
| TCGA-CN-6020-01 | M0 |
| TCGA-CN-6021-01 | M0 |
| TCGA-CN-6022-01 | R  |
| TCGA-CN-6023-01 | M0 |
| TCGA-CN-6024-01 | R  |
| TCGA-CN-6988-01 | M0 |
| TCGA-CN-6989-01 | R  |
| TCGA-CN-6992-01 | M0 |
| TCGA-CN-6994-01 | M0 |
| TCGA-CN-6995-01 | M0 |
| TCGA-CN-6996-01 | R  |
| TCGA-CN-6997-01 | M0 |
| TCGA-CN-6998-01 | M0 |
| TCGA-CN-A498-01 | R  |
| TCGA-CN-A49A-01 | R  |
| TCGA-CN-A642-01 | M0 |
| TCGA-CN-A6V3-01 | M0 |
| TCGA-CQ-5323-01 | M0 |

|                 |    |
|-----------------|----|
| TCGA-CQ-5324-01 | M0 |
| TCGA-CQ-5325-01 | R  |
| TCGA-CQ-5326-01 | M0 |
| TCGA-CQ-5327-01 | M0 |
| TCGA-CQ-5329-01 | M0 |
| TCGA-CQ-5330-01 | M0 |
| TCGA-CQ-5331-01 | M0 |
| TCGA-CQ-5332-01 | M0 |
| TCGA-CQ-5333-01 | R  |
| TCGA-CQ-5334-01 | R  |
| TCGA-CQ-6218-01 | M0 |
| TCGA-CQ-6220-01 | M0 |
| TCGA-CQ-6221-01 | M0 |
| TCGA-CQ-6223-01 | M0 |
| TCGA-CQ-6224-01 | M0 |
| TCGA-CQ-6225-01 | R  |
| TCGA-CQ-6227-01 | M0 |
| TCGA-CQ-6228-01 | R  |
| TCGA-CQ-6229-01 | M0 |
| TCGA-CQ-7063-01 | M0 |
| TCGA-CQ-7065-01 | R  |
| TCGA-CQ-7067-01 | M0 |
| TCGA-CQ-7068-01 | M0 |
| TCGA-CQ-7069-01 | M0 |
| TCGA-CQ-7071-01 | M0 |
| TCGA-CQ-7072-01 | M0 |
| TCGA-CQ-A4C6-01 | M0 |

|                 |    |
|-----------------|----|
| TCGA-CQ-A4C7-01 | M0 |
| TCGA-CQ-A4C9-01 | R  |
| TCGA-CQ-A4CB-01 | M0 |
| TCGA-CQ-A4CD-01 | M0 |
| TCGA-CQ-A4CE-01 | M0 |
| TCGA-CQ-A4CG-01 | M0 |
| TCGA-CQ-A4CH-01 | M0 |
| TCGA-CR-5243-01 | M0 |
| TCGA-CR-5247-01 | M0 |
| TCGA-CR-5248-01 | R  |
| TCGA-CR-5249-01 | M0 |
| TCGA-CR-6467-01 | M0 |
| TCGA-CR-6470-01 | M0 |
| TCGA-CR-6471-01 | R  |
| TCGA-CR-6472-01 | M0 |
| TCGA-CR-6473-01 | M0 |
| TCGA-CR-6474-01 | R  |
| TCGA-CR-6477-01 | M0 |
| TCGA-CR-6478-01 | M0 |
| TCGA-CR-6480-01 | M0 |
| TCGA-CR-6481-01 | M0 |
| TCGA-CR-6482-01 | M0 |
| TCGA-CR-6484-01 | M0 |
| TCGA-CR-6487-01 | M0 |
| TCGA-CR-6488-01 | M0 |
| TCGA-CR-6491-01 | M0 |
| TCGA-CR-6492-01 | M0 |

|                 |    |
|-----------------|----|
| TCGA-CR-6493-01 | M0 |
| TCGA-CR-7364-01 | M0 |
| TCGA-CR-7365-01 | M0 |
| TCGA-CR-7367-01 | M0 |
| TCGA-CR-7368-01 | M0 |
| TCGA-CR-7369-01 | M0 |
| TCGA-CR-7370-01 | M0 |
| TCGA-CR-7371-01 | M0 |
| TCGA-CR-7372-01 | M0 |
| TCGA-CR-7373-01 | M0 |
| TCGA-CR-7374-01 | M0 |
| TCGA-CR-7376-01 | M0 |
| TCGA-CR-7377-01 | M0 |
| TCGA-CR-7379-01 | M0 |
| TCGA-CR-7380-01 | R  |
| TCGA-CR-7382-01 | R  |
| TCGA-CR-7383-01 | R  |
| TCGA-CR-7385-01 | M0 |
| TCGA-CR-7386-01 | R  |
| TCGA-CR-7388-01 | R  |
| TCGA-CR-7389-01 | M0 |
| TCGA-CR-7390-01 | M0 |
| TCGA-CR-7391-01 | M0 |
| TCGA-CR-7392-01 | M0 |
| TCGA-CR-7393-01 | M0 |
| TCGA-CR-7394-01 | M0 |
| TCGA-CR-7395-01 | M0 |

|                 |    |
|-----------------|----|
| TCGA-CR-7397-01 | M0 |
| TCGA-CR-7398-01 | M0 |
| TCGA-CR-7399-01 | M0 |
| TCGA-CR-7401-01 | M0 |
| TCGA-CR-7402-01 | M0 |
| TCGA-CR-7404-01 | R  |
| TCGA-CV-5430-01 | R  |
| TCGA-CV-5432-01 | M0 |
| TCGA-CV-5434-01 | R  |
| TCGA-CV-5435-01 | R  |
| TCGA-CV-5436-01 | M0 |
| TCGA-CV-5439-01 | R  |
| TCGA-CV-5440-01 | M0 |
| TCGA-CV-5441-01 | M0 |
| TCGA-CV-5442-01 | M0 |
| TCGA-CV-5443-01 | M0 |
| TCGA-CV-5444-01 | M0 |
| TCGA-CV-5966-01 | M0 |
| TCGA-CV-5970-01 | M0 |
| TCGA-CV-5971-01 | M0 |
| TCGA-CV-5973-01 | M0 |
| TCGA-CV-5976-01 | M0 |
| TCGA-CV-5977-01 | M0 |
| TCGA-CV-5978-01 | M0 |
| TCGA-CV-5979-01 | M0 |
| TCGA-CV-6003-01 | M0 |
| TCGA-CV-6433-01 | M0 |



|                 |    |
|-----------------|----|
| TCGA-CV-6436-01 | M0 |
| TCGA-CV-6441-01 | M0 |
| TCGA-CV-6933-01 | M0 |
| TCGA-CV-6934-01 | M0 |
| TCGA-CV-6935-01 | M0 |
| TCGA-CV-6936-01 | M0 |
| TCGA-CV-6937-01 | M0 |
| TCGA-CV-6938-01 | M0 |
| TCGA-CV-6939-01 | M0 |
| TCGA-CV-6940-01 | M0 |
| TCGA-CV-6941-01 | M0 |
| TCGA-CV-6942-01 | M0 |
| TCGA-CV-6943-01 | M0 |
| TCGA-CV-6945-01 | M0 |
| TCGA-CV-6948-01 | M0 |
| TCGA-CV-6950-01 | M0 |
| TCGA-CV-6951-01 | M0 |
| TCGA-CV-6952-01 | M0 |
| TCGA-CV-6953-01 | M0 |
| TCGA-CV-6954-01 | M0 |
| TCGA-CV-6955-01 | M0 |
| TCGA-CV-6956-01 | M0 |
| TCGA-CV-6959-01 | M0 |
| TCGA-CV-6960-01 | M0 |
| TCGA-CV-6961-01 | M0 |
| TCGA-CV-6962-01 | M0 |
| TCGA-CV-7089-01 | M0 |

|                 |    |
|-----------------|----|
| TCGA-CV-7090-01 | M0 |
| TCGA-CV-7091-01 | M0 |
| TCGA-CV-7095-01 | M0 |
| TCGA-CV-7097-01 | M0 |
| TCGA-CV-7099-01 | M0 |
| TCGA-CV-7100-01 | M0 |
| TCGA-CV-7101-01 | M0 |
| TCGA-CV-7102-01 | M0 |
| TCGA-CV-7103-01 | M0 |
| TCGA-CV-7104-01 | M0 |
| TCGA-CV-7177-01 | M0 |
| TCGA-CV-7178-01 | M0 |
| TCGA-CV-7180-01 | M0 |
| TCGA-CV-7183-01 | M0 |
| TCGA-CV-7235-01 | M0 |
| TCGA-CV-7236-01 | M0 |
| TCGA-CV-7238-01 | M0 |
| TCGA-CV-7242-01 | M0 |
| TCGA-CV-7243-01 | M0 |
| TCGA-CV-7245-01 | M0 |
| TCGA-CV-7247-01 | M0 |
| TCGA-CV-7248-01 | M0 |
| TCGA-CV-7250-01 | M0 |
| TCGA-CV-7252-01 | M0 |
| TCGA-CV-7253-01 | M0 |
| TCGA-CV-7254-01 | M0 |
| TCGA-CV-7255-01 | M0 |

|                 |    |
|-----------------|----|
| TCGA-CV-7261-01 | M0 |
| TCGA-CV-7263-01 | M0 |
| TCGA-CV-7406-01 | M0 |
| TCGA-CV-7407-01 | M0 |
| TCGA-CV-7409-01 | M0 |
| TCGA-CV-7410-01 | M0 |
| TCGA-CV-7411-01 | M0 |
| TCGA-CV-7413-01 | M0 |
| TCGA-CV-7414-01 | M0 |
| TCGA-CV-7415-01 | M0 |
| TCGA-CV-7416-01 | M0 |
| TCGA-CV-7418-01 | M0 |
| TCGA-CV-7421-01 | M0 |
| TCGA-CV-7422-01 | M0 |
| TCGA-CV-7423-01 | M0 |
| TCGA-CV-7424-01 | M0 |
| TCGA-CV-7425-01 | M0 |
| TCGA-CV-7427-01 | M0 |
| TCGA-CV-7429-01 | M0 |
| TCGA-CV-7430-01 | M0 |
| TCGA-CV-7432-01 | M0 |
| TCGA-CV-7433-01 | M0 |
| TCGA-CV-7434-01 | M0 |
| TCGA-CV-7435-01 | M0 |
| TCGA-CV-7437-01 | M0 |
| TCGA-CV-7438-01 | M0 |
| TCGA-CV-7440-01 | M0 |

|                 |    |
|-----------------|----|
| TCGA-CV-A45O-01 | M0 |
| TCGA-CV-A45P-01 | R  |
| TCGA-CV-A45Q-01 | M0 |
| TCGA-CV-A45R-01 | M0 |
| TCGA-CV-A45T-01 | M0 |
| TCGA-CV-A45U-01 | M0 |
| TCGA-CV-A45V-01 | M0 |
| TCGA-CV-A45W-01 | M0 |
| TCGA-CV-A45X-01 | M0 |
| TCGA-CV-A45Y-01 | M0 |
| TCGA-CV-A45Z-01 | M0 |
| TCGA-CV-A460-01 | R  |
| TCGA-CV-A461-01 | M0 |
| TCGA-CV-A463-01 | M0 |
| TCGA-CV-A464-01 | M0 |
| TCGA-CV-A465-01 | M0 |
| TCGA-CV-A468-01 | M0 |
| TCGA-CV-A6JD-01 | M0 |
| TCGA-CV-A6JE-01 | M0 |
| TCGA-CV-A6JM-01 | R  |
| TCGA-CV-A6JN-01 | M0 |
| TCGA-CV-A6JO-01 | M0 |
| TCGA-CV-A6JT-01 | M0 |
| TCGA-CV-A6JU-01 | M0 |
| TCGA-CV-A6JY-01 | M0 |
| TCGA-CV-A6JZ-01 | R  |
| TCGA-CV-A6K0-01 | M0 |

|                 |    |
|-----------------|----|
| TCGA-CV-A6K1-01 | R  |
| TCGA-CV-A6K2-01 | R  |
| TCGA-CX-7082-01 | M0 |
| TCGA-CX-7085-01 | M0 |
| TCGA-CX-7086-01 | M0 |
| TCGA-CX-7219-01 | M0 |
| TCGA-D6-6515-01 | R  |
| TCGA-D6-6516-01 | M0 |
| TCGA-D6-6517-01 | M0 |
| TCGA-D6-6823-01 | M0 |
| TCGA-D6-6824-01 | M0 |
| TCGA-D6-6825-01 | M0 |
| TCGA-D6-6826-01 | M0 |
| TCGA-D6-6827-01 | M0 |
| TCGA-D6-8568-01 | M0 |
| TCGA-D6-8569-01 | M0 |
| TCGA-D6-A4Z9-01 | M0 |
| TCGA-D6-A4ZB-01 | M0 |
| TCGA-D6-A6EK-01 | M0 |
| TCGA-D6-A6EM-01 | M0 |
| TCGA-D6-A6EO-01 | M0 |
| TCGA-D6-A6EP-01 | M0 |
| TCGA-D6-A6EQ-01 | M0 |
| TCGA-D6-A6ES-01 | M0 |
| TCGA-D6-A74Q-01 | M0 |
| TCGA-DQ-5624-01 | M0 |
| TCGA-DQ-5625-01 | R  |

|                 |    |
|-----------------|----|
| TCGA-DQ-5629-01 | M0 |
| TCGA-DQ-5630-01 | M0 |
| TCGA-DQ-5631-01 | R  |
| TCGA-DQ-7588-01 | R  |
| TCGA-DQ-7589-01 | M1 |
| TCGA-DQ-7590-01 | M0 |
| TCGA-DQ-7591-01 | M0 |
| TCGA-DQ-7592-01 | M0 |
| TCGA-DQ-7593-01 | M0 |
| TCGA-DQ-7594-01 | M0 |
| TCGA-DQ-7595-01 | M0 |
| TCGA-DQ-7596-01 | R  |
| TCGA-F7-7848-01 | M0 |
| TCGA-F7-8489-01 | M0 |
| TCGA-F7-A50G-01 | M0 |
| TCGA-F7-A50I-01 | M0 |
| TCGA-F7-A50J-01 | M0 |
| TCGA-F7-A61S-01 | R  |
| TCGA-H7-7774-01 | R  |
| TCGA-H7-8501-01 | M0 |
| TCGA-H7-A6C4-01 | M0 |
| TCGA-HD-7229-01 | M0 |
| TCGA-HD-7753-01 | M0 |
| TCGA-HD-7754-01 | M0 |
| TCGA-HD-7831-01 | M0 |
| TCGA-HD-7832-01 | M0 |
| TCGA-HD-7917-01 | M0 |

|                 |    |
|-----------------|----|
| TCGA-HD-8224-01 | R  |
| TCGA-HD-8314-01 | M0 |
| TCGA-HD-A633-01 | R  |
| TCGA-HL-7533-01 | M0 |
| TCGA-IQ-7630-01 | M0 |
| TCGA-IQ-7631-01 | M0 |
| TCGA-IQ-7632-01 | M0 |
| TCGA-IQ-A61I-01 | M0 |
| TCGA-IQ-A61J-01 | M0 |
| TCGA-KU-A66S-01 | R  |
| TCGA-KU-A66T-01 | R  |
| TCGA-KU-A6H7-01 | M0 |
| TCGA-KU-A6H8-01 | R  |
| TCGA-MT-A51W-01 | M0 |
| TCGA-MT-A51X-01 | M0 |
| TCGA-MT-A67D-01 | M0 |
| TCGA-MT-A7BN-01 | R  |
| TCGA-MZ-A5BI-01 | M0 |
| TCGA-MZ-A6I9-01 | R  |
| TCGA-P3-A5Q6-01 | R  |
| TCGA-P3-A6T5-01 | R  |
| TCGA-P3-A6T6-01 | R  |
| TCGA-QK-A64Z-01 | R  |
| TCGA-QK-A6IF-01 | R  |
| TCGA-QK-A6IG-01 | R  |
| TCGA-QK-A6IH-01 | R  |
| TCGA-QK-A6II-01 | R  |

|                 |    |
|-----------------|----|
| TCGA-QK-A6IJ-01 | M0 |
| TCGA-QK-A6V9-01 | M0 |
| TCGA-QK-A6VB-01 | M0 |
| TCGA-QK-A6VC-01 | M0 |
| TCGA-RS-A6TO-01 | R  |
| TCGA-RS-A6TP-01 | M0 |
| TCGA-T2-A6WX-01 | M0 |
| TCGA-T2-A6WZ-01 | R  |
| TCGA-T2-A6X0-01 | M0 |
| TCGA-T2-A6X2-01 | M0 |
| TCGA-TN-A7HI-01 | M0 |
| TCGA-TN-A7HJ-01 | M0 |
| TCGA-TN-A7HL-01 | M0 |
| TCGA-UF-A718-01 | M0 |
| TCGA-UF-A719-01 | M0 |
| TCGA-UF-A71A-01 | M0 |
| TCGA-UF-A71B-01 | M0 |
| TCGA-UF-A71D-01 | M0 |
| TCGA-UF-A71E-01 | M0 |
| TCGA-UF-A7J9-01 | M0 |
| TCGA-UF-A7JA-01 | M0 |
| TCGA-UF-A7JC-01 | M0 |
| TCGA-UF-A7JD-01 | M0 |
| TCGA-UF-A7JF-01 | M0 |
| TCGA-UF-A7JH-01 | M0 |
| TCGA-UF-A7JJ-01 | M0 |
| TCGA-UF-A7JK-01 | M0 |



|                 |    |
|-----------------|----|
| TCGA-UF-A7JO-01 | M0 |
| TCGA-UF-A7JS-01 | R  |
| TCGA-UF-A7JT-01 | M0 |
| TCGA-UF-A7JV-01 | M0 |
| TCGA-WA-A7GZ-01 | M0 |
| TCGA-WA-A7H4-01 | M0 |
| TCGA-CV-5430-11 | N  |
| TCGA-CV-5431-11 | N  |
| TCGA-CV-5432-11 | N  |
| TCGA-CV-5434-11 | N  |
| TCGA-CV-5435-11 | N  |
| TCGA-CV-5436-11 | N  |
| TCGA-CV-5439-11 | N  |
| TCGA-CV-5440-11 | N  |
| TCGA-CV-5441-11 | N  |
| TCGA-CV-5442-11 | N  |
| TCGA-CV-5443-11 | N  |
| TCGA-CV-5444-11 | N  |
| TCGA-CV-5966-11 | N  |
| TCGA-CV-5970-11 | N  |
| TCGA-CV-5971-11 | N  |
| TCGA-CV-5973-11 | N  |
| TCGA-CV-5976-11 | N  |
| TCGA-CV-5977-11 | N  |
| TCGA-CV-5978-11 | N  |
| TCGA-CV-5979-11 | N  |
| TCGA-CV-6003-11 | N  |

|                 |   |
|-----------------|---|
| TCGA-CV-6433-11 | N |
| TCGA-CV-6436-11 | N |
| TCGA-CV-6441-11 | N |
| TCGA-CV-6933-11 | N |
| TCGA-CV-6934-11 | N |
| TCGA-CV-6935-11 | N |
| TCGA-CV-6936-11 | N |
| TCGA-CV-6938-11 | N |
| TCGA-CV-6939-11 | N |
| TCGA-CV-6943-11 | N |
| TCGA-CV-6951-11 | N |
| TCGA-CV-6952-11 | N |
| TCGA-CV-6953-11 | N |
| TCGA-CV-6954-11 | N |
| TCGA-CV-6955-11 | N |
| TCGA-CV-6956-11 | N |
| TCGA-CV-6959-11 | N |
| TCGA-CV-6960-11 | N |
| TCGA-CV-6961-11 | N |
| TCGA-CV-6962-11 | N |
| TCGA-CV-7089-11 | N |
| TCGA-CV-7091-11 | N |
| TCGA-CV-7097-11 | N |
| TCGA-CV-7101-11 | N |
| TCGA-CV-7103-11 | N |
| TCGA-CV-7177-11 | N |
| TCGA-CV-7178-11 | N |

|                 |   |
|-----------------|---|
| TCGA-CV-7183-11 | N |
| TCGA-CV-7235-11 | N |
| TCGA-CV-7238-11 | N |
| TCGA-CV-7242-11 | N |
| TCGA-CV-7245-11 | N |
| TCGA-CV-7250-11 | N |
| TCGA-CV-7252-11 | N |
| TCGA-CV-7255-11 | N |
| TCGA-CV-7261-11 | N |
| TCGA-CV-7263-11 | N |
| TCGA-CV-7406-11 | N |
| TCGA-CV-7416-11 | N |
| TCGA-CV-7423-11 | N |
| TCGA-CV-7424-11 | N |
| TCGA-CV-7425-11 | N |
| TCGA-CV-7432-11 | N |
| TCGA-CV-7434-11 | N |
| TCGA-CV-7437-11 | N |
| TCGA-CV-7438-11 | N |
| TCGA-CV-7440-11 | N |
| TCGA-H7-A6C5-11 | N |
| TCGA-HD-8635-11 | N |
| TCGA-HD-A6HZ-11 | N |
| TCGA-HD-A6I0-11 | N |
| TCGA-WA-A7GZ-11 | N |

**Supplementary Table S2:** Oral tongue squamous cell carcinoma (OTSCC) and TCGA HNSC samples lacking cross-platform overlap, and their clinical attributes used for validation.

| SampleID | R (Loco-regional recurrence); M1(metastasis); M0 (Non-metastatic/Non-recurrent) tumors; N (Solid Tissue Normals) |
|----------|------------------------------------------------------------------------------------------------------------------|
| OT10_T   | M0                                                                                                               |
| OT13_T   | M0                                                                                                               |
| OT15_T   | R                                                                                                                |
| OT16_T   | R                                                                                                                |
| OT18_T   | M1                                                                                                               |
| OT20_T   | R                                                                                                                |
| OT21_T   | R                                                                                                                |
| OT23_T   | M0                                                                                                               |
| OT25_T   | M0                                                                                                               |
| OT27_T   | M0                                                                                                               |
| OT29_T   | M0                                                                                                               |
| OT30_T   | M0                                                                                                               |
| OT31_T   | M0                                                                                                               |
| OT32_T   | M0                                                                                                               |
| OT33_T   | M0                                                                                                               |
| OT34_T   | R                                                                                                                |
| OT35_T   | M0                                                                                                               |
| OT36_T   | R                                                                                                                |
| OT37_T   | M0                                                                                                               |
| OT38_T   | R                                                                                                                |
| OT39_T   | M0                                                                                                               |
| OT4_T    | R                                                                                                                |

|                 |    |
|-----------------|----|
| OT40_T          | R  |
| OT41_T          | M0 |
| OT42_T          | M0 |
| OT43_T          | M0 |
| OT45_T          | M0 |
| OT46_T          | M0 |
| OT47_T          | M0 |
| OT48_T          | R  |
| OT49_T          | R  |
| OT5_T           | R  |
| OT50_T          | M1 |
| OT53_T          | M0 |
| OT55_T          | R  |
| OT7_T           | M0 |
| OT9_T           | M0 |
| TCGA-BA-A6DE-01 | M0 |
| TCGA-BA-A6DF-01 | M0 |
| TCGA-BA-A6DF-01 | M0 |
| TCGA-BA-A6DL-01 | M0 |
| TCGA-BA-A8YP-01 | M0 |
| TCGA-BA-A8YP-01 | M0 |
| TCGA-BB-7864-01 | M0 |
| TCGA-BB-7866-01 | M0 |
| TCGA-BB-7866-01 | M0 |
| TCGA-C9-A480-01 | M0 |
| TCGA-CN-4722-01 | M0 |
| TCGA-CN-4722-01 | M0 |

|                 |    |
|-----------------|----|
| TCGA-CN-4734-01 | M0 |
| TCGA-CN-4734-01 | M0 |
| TCGA-CN-5361-01 | M0 |
| TCGA-CN-5361-01 | M0 |
| TCGA-CQ-6219-01 | R  |
| TCGA-CQ-6219-01 | R  |
| TCGA-CQ-6222-01 | M0 |
| TCGA-CQ-6222-01 | M0 |
| TCGA-CQ-7063-01 | M0 |
| TCGA-CQ-7064-01 | M0 |
| TCGA-CQ-7064-01 | M0 |
| TCGA-CQ-A4C9-01 | M0 |
| TCGA-CQ-A4CA-01 | M0 |
| TCGA-CQ-A4CA-01 | M0 |
| TCGA-CR-5249-01 | M0 |
| TCGA-CR-5250-01 | M0 |
| TCGA-CR-5250-01 | M0 |
| TCGA-CV-5430-01 | M0 |
| TCGA-CV-5431-01 | M0 |
| TCGA-CV-5431-01 | M0 |
| TCGA-CV-7427-01 | M0 |
| TCGA-CV-7428-01 | M0 |
| TCGA-CV-7428-01 | M0 |
| TCGA-CV-7446-01 | M0 |
| TCGA-CV-7446-01 | M0 |
| TCGA-CV-7568-01 | M0 |
| TCGA-CV-7568-01 | M0 |

|                 |    |
|-----------------|----|
| TCGA-F7-7848-01 | M0 |
| TCGA-F7-8298-01 | M0 |
| TCGA-F7-8298-01 | M0 |
| TCGA-H7-8501-01 | M0 |
| TCGA-H7-8502-01 | M0 |
| TCGA-H7-8502-01 | M0 |
| TCGA-H7-A6C4-01 | M0 |
| TCGA-H7-A6C5-01 | M0 |
| TCGA-H7-A6C5-01 | M0 |
| TCGA-IQ-A61J-01 | M0 |
| TCGA-IQ-A61K-01 | M0 |
| TCGA-IQ-A61K-01 | M0 |
| TCGA-IQ-A61L-01 | M0 |
| TCGA-IQ-A61L-01 | M0 |
| TCGA-KU-A6H7-06 | M0 |
| TCGA-KU-A6H7-06 | M0 |
| TCGA-QK-A6VC-01 | M0 |
| TCGA-QK-A8Z7-01 | M0 |
| TCGA-QK-A8Z7-01 | M1 |
| TCGA-QK-A8Z8-01 | M1 |
| TCGA-QK-A8Z8-01 | R  |
| TCGA-QK-A8Z9-01 | R  |
| TCGA-QK-A8Z9-01 | R  |
| TCGA-QK-A8ZA-01 | M0 |
| TCGA-QK-A8ZB-0  | M0 |
| TCGA-QK-A8ZB-01 | M0 |
| TCGA-QK-AA3J-01 | M0 |

|                 |    |
|-----------------|----|
| TCGA-QK-AA3J-01 | M0 |
| TCGA-UF-A71A-06 | M0 |
| TCGA-UF-A71A-06 | M0 |
| OT10_N          | N  |
| OT13_N          | N  |
| OT15_N          | N  |
| OT16_N          | N  |
| OT18_N          | N  |
| OT20_N          | N  |
| OT21_N          | N  |
| OT23_N          | N  |
| OT25_N          | N  |
| OT27_N          | N  |
| OT29_N          | N  |
| OT30_N          | N  |
| OT31_N          | N  |
| OT32_N          | N  |
| OT33_N          | N  |
| OT34_N          | N  |
| OT35_N          | N  |
| OT36_N          | N  |
| OT37_N          | N  |
| OT38_N          | N  |
| OT39_N          | N  |
| OT4_N           | N  |
| OT40_N          | N  |
| OT41_N          | N  |



|        |   |
|--------|---|
| OT42_N | N |
| OT43_N | N |
| OT45_N | N |
| OT46_N | N |
| OT47_N | N |
| OT48_N | N |
| OT49_N | N |
| OT5_N  | N |
| OT50_N | N |
| OT53_N | N |
| OT55_N | N |
| OT7_N  | N |
| OT9_N  | N |

| Supplementary Table S3: Oral tongue squamous cell carcinoma (OTSCC) with all four events assayed within the same tumor, and their clinical attributes used for validation. |                                                                                                                   |
|----------------------------------------------------------------------------------------------------------------------------------------------------------------------------|-------------------------------------------------------------------------------------------------------------------|
| S<br>a<br>m<br>p<br>l<br>e<br>I<br>D                                                                                                                                       | R (Loco-regional recurrence); M1(metastasis); M0 (Non-metastatic/Non-recurrent) tumors; N (Solid Tissue Normals). |
| OT1_T                                                                                                                                                                      | M0                                                                                                                |
| OT11_T                                                                                                                                                                     | M0                                                                                                                |
| OT12_T                                                                                                                                                                     | M0                                                                                                                |
| OT14_T                                                                                                                                                                     | M0                                                                                                                |

|        |    |
|--------|----|
| OT17_T | M0 |
| OT19_T | M0 |
| OT2_T  | M1 |
| OT22_T | M0 |
| OT24_T | M0 |
| OT26_T | M0 |
| OT28_T | M0 |
| OT52_T | M0 |
| OT54_T | M0 |
| OT3_T  | M0 |
| OT6_T  | M0 |
| OT8_T  | M0 |
| OT44_T | R  |
| OT51_T | M1 |
| OT1_N  | N  |
| OT11_N | N  |
| OT12_N | N  |
| OT14_N | N  |
| OT17_N | N  |
| OT19_N | N  |
| OT2_N  | N  |
| OT22_N | N  |
| OT24_N | N  |
| OT26_N | N  |
| OT28_N | N  |
| OT52_N | N  |

|        |   |
|--------|---|
| OT54_N | N |
| OT3_N  | N |
| OT6_N  | N |
| OT8_N  | N |
| OT44_N | N |
| OT51_N | N |

**Supplementary Table S4:** Discovered events associated with Metastases and Recurrence in TCGA HNSCC, pathways mapped, confirmation and validation status.

| user_selected_clinical_variable | event_affected_gene | event_type | event      | sample_frequency | event_priority | filter_type           | cancer_pathways | confirmation | validation | minimal_discovery_panel |
|---------------------------------|---------------------|------------|------------|------------------|----------------|-----------------------|-----------------|--------------|------------|-------------------------|
| Met/REC                         | ACSS3               | cnv        | D_ACSS3    | 1.20482          | D              | event_priority_filter | NA              | YES          | YES        | YES                     |
| Met/REC                         | AGO3                | cnv        | D_AGO3     | 1.20482          | D              | event_priority_filter | NA              | YES          | YES        | YES                     |
| Met/REC                         | ANAPC4              | cnv        | D_ANAPC4   | 1.20482          | D              | event_priority_filter | cell_cycle      | YES          | YES        | NO                      |
| Met/REC                         | ANKFY1              | fcnv       | D_ANKFY1   | 2.40964          | B              | event_priority_filter | NA              | YES          | YES        | NO                      |
| Met/REC                         | ANO5                | cnv        | I_ANO5     | 2.40964          | D              | event_priority_filter | NA              | YES          | YES        | NO                      |
| Met/REC                         | ANXA11              | fcnv       | I_ANXA11   | 1.20482          | B              | event_priority_filter | NA              | YES          | YES        | YES                     |
| Met/REC                         | ARHGAP10            | cnv        | I_ARHGAP10 | 1.20482          | D              | event_priority_filter | NA              | YES          | YES        | NO                      |
| Met/REC                         | ARHGEF38            | cnv        | D_ARHGEF38 | 1.20482          | D              | event_priority_filter | NA              | YES          | YES        | YES                     |
| Met/REC                         | CALY                | cnv        | D_CALY     | 1.20482          | D              | event_priority_filter | NA              | YES          | YES        | NO                      |
| Met/REC                         | CCDC97              | fcnv       | I_CCDC97   | 1.20482          | B              | event_priority_filter | NA              | YES          | YES        | NO                      |
| Met/REC                         | CCKAR               | cnv        | D_CCKAR    | 1.20482          | D              | event_priority_filter | NA              | YES          | YES        | NO                      |
| Met/REC                         | CCPG1               | fcnv       | I_CCPG1    | 1.20482          | B              | event_priority_filter | NA              | YES          | YES        | NO                      |
| Met/REC                         | CIC                 | fcnv       | I_CIC      | 1.20482          | B              | event_priority_filter | NA              | YES          | YES        | NO                      |
| Met/REC                         | CNDP1               | cnv        | I_CNDP1    | 2.40964          | D              | event_priority_filter | NA              | YES          | YES        | NO                      |
| Met/REC                         | CNKS3               | cnv        | D_CNKS3    | 2.40964          | D              | event_priority_filter | NA              | YES          | YES        | NO                      |

|         |        |      |          |         |   |                           |                   |     |     |     |
|---------|--------|------|----------|---------|---|---------------------------|-------------------|-----|-----|-----|
| Met/REC | COPS2  | fcnv | I_COPS2  | 1.20482 | B | event_priority_<br>filter | NA                | YES | YES | NO  |
| Met/REC | CSRP3  | cnv  | I_CSRP3  | 2.40964 | D | event_priority_<br>filter | NA                | YES | YES | NO  |
| Met/REC | DBX1   | cnv  | I_DBX1   | 2.40964 | D | event_priority_<br>filter | NA                | YES | YES | NO  |
| Met/REC | DCLK2  | cnv  | I_DCLK2  | 1.20482 | D | event_priority_<br>filter | NA                | YES | YES | NO  |
| Met/REC | DOCK2  | cnv  | D_DOCK2  | 1.20482 | D | event_priority_<br>filter | NA                | YES | YES | NO  |
| Met/REC | DVL2   | fcnv | D_DVL2   | 1.20482 | B | event_priority_<br>filter | mtor_wnt          | YES | YES | YES |
| Met/REC | ECHS1  | cnv  | D_ECHS1  | 1.20482 | D | event_priority_<br>filter | NA                | YES | YES | NO  |
| Met/REC | ERF    | fcnv | I_ERF    | 1.20482 | B | event_priority_<br>filter | NA                | YES | YES | NO  |
| Met/REC | FBXW7  | cnv  | I_FBXW7  | 1.20482 | D | event_priority_<br>filter | NA                | YES | YES | NO  |
| Met/REC | FGF10  | cnv  | D_FGF10  | 1.20482 | D | event_priority_<br>filter | mapk_pi3k<br>_akt | YES | YES | YES |
| Met/REC | FGFR4  | fcnv | I_FGFR4  | 1.20482 | B | event_priority_<br>filter | mapk_pi3k<br>_akt | YES | YES | YES |
| Met/REC | FRMPD4 | cnv  | I_FRMPD4 | 2.40964 | D | event_priority_<br>filter | NA                | YES | YES | YES |
| Met/REC | FUOM   | cnv  | D_FUOM   | 1.20482 | D | event_priority_<br>filter | NA                | YES | YES | NO  |
| Met/REC | GAS2   | cnv  | I_GAS2   | 2.40964 | D | event_priority_<br>filter | NA                | YES | YES | NO  |
| Met/REC | GBE1   | cnv  | I_GBE1   | 1.20482 | D | event_priority_<br>filter | NA                | YES | YES | NO  |
| Met/REC | GCSAML | cnv  | D_GCSAML | 1.20482 | D | event_priority_<br>filter | NA                | YES | YES | NO  |
| Met/REC | GNPDA2 | cnv  | D_GNPDA2 | 3.61446 | D | event_priority_<br>filter | NA                | YES | YES | NO  |
| Met/REC | GRXCR1 | cnv  | D_GRXCR1 | 3.61446 | D | event_priority_<br>filter | NA                | YES | YES | NO  |

|         |              |      |            |         |   |                           |    |     |     |     |
|---------|--------------|------|------------|---------|---|---------------------------|----|-----|-----|-----|
| Met/REC | GTF2H1       | cnv  | I_GTF2H1   | 2.40964 | D | event_priority_<br>filter | NA | YES | YES | NO  |
| Met/REC | GUF1         | cnv  | D_GUF1     | 3.61446 | D | event_priority_<br>filter | NA | YES | YES | NO  |
| Met/REC | HK2          | cnv  | D_HK2      | 1.20482 | D | event_priority_<br>filter | NA | YES | YES | YES |
| Met/REC | HTATIP2      | cnv  | I_HTATIP2  | 2.40964 | D | event_priority_<br>filter | NA | YES | YES | NO  |
| Met/REC | IGSF22       | cnv  | I_IGSF22   | 2.40964 | D | event_priority_<br>filter | NA | YES | YES | NO  |
| Met/REC | KCNC1        | cnv  | I_KCNC1    | 2.40964 | D | event_priority_<br>filter | NA | YES | YES | NO  |
| Met/REC | LDHAL6A      | cnv  | I_LDHAL6A  | 2.40964 | D | event_priority_<br>filter | NA | YES | YES | NO  |
| Met/REC | MAGI3        | cnv  | I_MAGI3    | 1.20482 | D | event_priority_<br>filter | NA | YES | YES | YES |
| Met/REC | MAT1A        | fcnv | I_MAT1A    | 1.20482 | B | event_priority_<br>filter | NA | YES | YES | NO  |
| Met/REC | MIR573       | cnv  | I_MIR573   | 1.20482 | D | event_priority_<br>filter | NA | YES | YES | YES |
| Met/REC | MMAA         | cnv  | I_MMAA     | 1.20482 | D | event_priority_<br>filter | NA | YES | YES | NO  |
| Met/REC | MORC3        | fcnv | I_MORC3    | 1.20482 | B | event_priority_<br>filter | NA | NO  | NA  | NO  |
| Met/REC | MORF4L1      | fcnv | D_MORF4L1  | 1.20482 | B | event_priority_<br>filter | NA | YES | YES | YES |
| Met/REC | MPHOSPH<br>6 | cnv  | D_MPHOSPH6 | 1.20482 | D | event_priority_<br>filter | NA | YES | YES | YES |
| Met/REC | MRGPRX2      | cnv  | I_MRGPRX2  | 2.40964 | D | event_priority_<br>filter | NA | YES | YES | NO  |
| Met/REC | MTHFS        | fcnv | D_MTHFS    | 1.20482 | B | event_priority_<br>filter | NA | YES | YES | YES |
| Met/REC | MUC15        | cnv  | I_MUC15    | 2.40964 | D | event_priority_<br>filter | NA | YES | YES | NO  |
| Met/REC | MYO5C        | fcnv | I_MYO5C    | 1.20482 | B | event_priority_<br>filter | NA | YES | YES | NO  |

|         |        |      |          |         |   |                           |      |     |     |     |
|---------|--------|------|----------|---------|---|---------------------------|------|-----|-----|-----|
| Met/REC | NAV2   | cnv  | I_NAV2   | 2.40964 | D | event_priority_<br>filter | NA   | YES | YES | NO  |
| Met/REC | NEDD4  | fcnv | I_NEDD4  | 1.20482 | B | event_priority_<br>filter | NA   | YES | YES | NO  |
| Met/REC | NELL1  | cnv  | I_NELL1  | 2.40964 | D | event_priority_<br>filter | NA   | YES | YES | NO  |
| Met/REC | NLRP3  | cnv  | D_NLRP3  | 1.20482 | D | event_priority_<br>filter | NA   | YES | YES | NO  |
| Met/REC | NNT    | cnv  | D_NNT    | 1.20482 | D | event_priority_<br>filter | NA   | YES | YES | YES |
| Met/REC | NR3C2  | cnv  | I_NR3C2  | 1.20482 | D | event_priority_<br>filter | NA   | YES | YES | NO  |
| Met/REC | NSUN5  | fcnv | D_NSUN5  | 1.20482 | B | event_priority_<br>filter | NA   | YES | YES | NO  |
| Met/REC | OR2B11 | cnv  | D_OR2B11 | 1.20482 | D | event_priority_<br>filter | NA   | YES | YES | NO  |
| Met/REC | OR2C3  | cnv  | D_OR2C3  | 1.20482 | D | event_priority_<br>filter | NA   | YES | YES | NO  |
| Met/REC | OXCT1  | cnv  | D_OXCT1  | 1.20482 | D | event_priority_<br>filter | NA   | YES | YES | YES |
| Met/REC | PFKM   | fcnv | D_PFKM   | 1.20482 | B | event_priority_<br>filter | NA   | YES | YES | NO  |
| Met/REC | PLAUR  | fcnv | I_PLAUR  | 1.20482 | B | event_priority_<br>filter | NA   | YES | YES | YES |
| Met/REC | PRAP1  | cnv  | D_PRAP1  | 1.20482 | D | event_priority_<br>filter | NA   | YES | YES | NO  |
| Met/REC | PRMT3  | cnv  | I_PRMT3  | 2.40964 | D | event_priority_<br>filter | NA   | YES | YES | NO  |
| Met/REC | PTPN5  | cnv  | I_PTPN5  | 2.40964 | D | event_priority_<br>filter | mapk | YES | YES | NO  |
| Met/REC | PTPRR  | cnv  | D_PTPRR  | 1.20482 | D | event_priority_<br>filter | mapk | NO  | NA  | NO  |
| Met/REC | RAB27A | fcnv | I_RAB27A | 1.20482 | B | event_priority_<br>filter | NA   | YES | YES | NO  |
| Met/REC | RERGL  | cnv  | D_RERGL  | 1.20482 | D | event_priority_<br>filter | NA   | YES | YES | YES |

|         |         |      |           |         |   |                           |      |     |     |     |
|---------|---------|------|-----------|---------|---|---------------------------|------|-----|-----|-----|
| Met/REC | RFC2    | fcnv | D_RFC2    | 1.20482 | B | event_priority_<br>filter | NA   | YES | YES | NO  |
| Met/REC | RICTOR  | cnv  | D_RICTOR  | 1.20482 | D | event_priority_<br>filter | mtor | YES | YES | YES |
| Met/REC | RPAP2   | cnv  | D_RPAP2   | 1.20482 | D | event_priority_<br>filter | NA   | YES | YES | YES |
| Met/REC | RPL26L1 | fcnv | I_RPL26L1 | 1.20482 | B | event_priority_<br>filter | NA   | YES | YES | YES |
| Met/REC | RPS3A   | cnv  | I_RPS3A   | 1.20482 | D | event_priority_<br>filter | NA   | YES | YES | NO  |
| Met/REC | SAA4    | cnv  | I_SAA4    | 2.40964 | D | event_priority_<br>filter | NA   | YES | YES | NO  |
| Met/REC | SAAL1   | cnv  | I_SAAL1   | 2.40964 | D | event_priority_<br>filter | NA   | YES | YES | NO  |
| Met/REC | SEL1L3  | cnv  | D_SEL1L3  | 1.20482 | D | event_priority_<br>filter | NA   | YES | YES | NO  |
| Met/REC | SENP1   | fcnv | D_SENP1   | 1.20482 | B | event_priority_<br>filter | NA   | YES | YES | NO  |
| Met/REC | SERGEF  | cnv  | I_SERGEF  | 2.40964 | D | event_priority_<br>filter | NA   | YES | YES | NO  |
| Met/REC | SH3D19  | cnv  | I_SH3D19  | 1.20482 | D | event_priority_<br>filter | NA   | YES | YES | NO  |
| Met/REC | SLC17A6 | cnv  | I_SLC17A6 | 2.40964 | D | event_priority_<br>filter | NA   | YES | YES | NO  |
| Met/REC | SLC34A2 | cnv  | D_SLC34A2 | 1.20482 | D | event_priority_<br>filter | NA   | YES | YES | NO  |
| Met/REC | SLC5A12 | cnv  | I_SLC5A12 | 2.40964 | D | event_priority_<br>filter | NA   | YES | YES | NO  |
| Met/REC | SMAD1   | cnv  | I_SMAD1   | 1.20482 | D | event_priority_<br>filter | tgf  | YES | YES | NO  |
| Met/REC | SMIM20  | cnv  | D_SMIM20  | 1.20482 | D | event_priority_<br>filter | NA   | YES | YES | NO  |
| Met/REC | SMIM21  | cnv  | I_SMIM21  | 2.40964 | D | event_priority_<br>filter | NA   | YES | YES | NO  |
| Met/REC | SPTY2D1 | cnv  | I_SPTY2D1 | 2.40964 | D | event_priority_<br>filter | NA   | YES | YES | NO  |



|         |         |      |           |         |   |                           |    |     |     |     |
|---------|---------|------|-----------|---------|---|---------------------------|----|-----|-----|-----|
| Met/REC | SRBD1   | cnv  | D_SRBD1   | 1.20482 | D | event_priority_<br>filter | NA | YES | YES | NO  |
| Met/REC | SSBP2   | cnv  | D_SSBP2   | 2.40964 | D | event_priority_<br>filter | NA | YES | YES | NO  |
| Met/REC | SVIP    | cnv  | I_SVIP    | 2.40964 | D | event_priority_<br>filter | NA | YES | YES | NO  |
| Met/REC | SYDE2   | cnv  | D_SYDE2   | 2.40964 | D | event_priority_<br>filter | NA | YES | YES | NO  |
| Met/REC | TBC1D19 | cnv  | D_TBC1D19 | 1.20482 | D | event_priority_<br>filter | NA | YES | YES | NO  |
| Met/REC | TMEM154 | cnv  | I_TMEM154 | 1.20482 | D | event_priority_<br>filter | NA | YES | YES | NO  |
| Met/REC | TMEM155 | fcnv | I_TMEM155 | 1.20482 | B | event_priority_<br>filter | NA | YES | YES | NO  |
| Met/REC | TMEM86A | cnv  | I_TMEM86A | 2.40964 | D | event_priority_<br>filter | NA | YES | YES | NO  |
| Met/REC | TPH1    | cnv  | I_TPH1    | 2.40964 | D | event_priority_<br>filter | NA | YES | YES | NO  |
| Met/REC | TSG101  | cnv  | I_TSG101  | 2.40964 | D | event_priority_<br>filter | NA | YES | YES | NO  |
| Met/REC | TSHZ1   | cnv  | I_TSHZ1   | 2.40964 | D | event_priority_<br>filter | NA | YES | YES | NO  |
| Met/REC | UEVLD   | cnv  | I_UEVLD   | 2.40964 | D | event_priority_<br>filter | NA | YES | YES | NO  |
| Met/REC | USP32   | cnv  | D_USP32   | 1.20482 | D | event_priority_<br>filter | NA | YES | YES | YES |
| Met/REC | USP8    | fcnv | I_USP8    | 1.20482 | B | event_priority_<br>filter | NA | YES | YES | NO  |
| Met/REC | YIPF7   | cnv  | D_YIPF7   | 3.61446 | D | event_priority_<br>filter | NA | YES | YES | NO  |
| Met/REC | ZADH2   | cnv  | I_ZADH2   | 2.40964 | D | event_priority_<br>filter | NA | YES | YES | NO  |
| Met/REC | ZBTB7A  | fcnv | I_ZBTB7A  | 1.20482 | B | event_priority_<br>filter | NA | YES | YES | YES |
| Met/REC | ZCCHC4  | cnv  | D_ZCCHC4  | 1.20482 | D | event_priority_<br>filter | NA | YES | YES | NO  |

|         |         |      |           |         |    |                             |    |     |     |     |
|---------|---------|------|-----------|---------|----|-----------------------------|----|-----|-----|-----|
| Met/REC | ZDHHC13 | cnv  | I_ZDHHC13 | 2.40964 | D  | event_priority_<br>filter   | NA | YES | YES | NO  |
| Met/REC | ZNF407  | cnv  | I_ZNF407  | 2.40964 | D  | event_priority_<br>filter   | NA | YES | YES | NO  |
| Met/REC | ZNF511  | cnv  | D_ZNF511  | 1.20482 | D  | event_priority_<br>filter   | NA | YES | YES | NO  |
| Met/REC | ZNF827  | cnv  | I_ZNF827  | 1.20482 | D  | event_priority_<br>filter   | NA | YES | YES | NO  |
| Met/REC | ACAD8   | mut  | ACAD8     | 3.61446 | A  | sample_freque<br>ncy_filter | NA | NO  | NA  | NO  |
| Met/REC | AIMP1   | expr | AIMP1     | 7.22892 | NA | event_priority_<br>filter   | NA | YES | YES | YES |
| Met/REC | C1QA    | expr | C1QA      | 4.81928 | E  | event_priority_<br>filter   | NA | NO  | NA  | NO  |
| Met/REC | C1QB    | expr | C1QB      | 4.81928 | E  | event_priority_<br>filter   | NA | NO  | NA  | NO  |
| Met/REC | CHPF2   | expr | CHPF2     | 6.0241  | E  | sample_freque<br>ncy_filter | NA | NO  | NA  | NO  |
| Met/REC | CHPF2   | expr | CHPF2     | 6.0241  | NA | event_priority_<br>filter   | NA | NO  | NA  | NO  |
| Met/REC | CIC     | expr | CIC       | 7.22892 | E  | sample_freque<br>ncy_filter | NA | YES | YES | YES |
| Met/REC | CIC     | expr | CIC       | 7.22892 | NA | event_priority_<br>filter   | NA | YES | YES | YES |
| Met/REC | CTU1    | expr | CTU1      | 4.81928 | E  | sample_freque<br>ncy_filter | NA | YES | YES | YES |
| Met/REC | CTU1    | expr | CTU1      | 4.81928 | NA | sample_freque<br>ncy_filter | NA | YES | YES | YES |
| Met/REC | DOHH    | expr | DOHH      | 7.22892 | NA | event_priority_<br>filter   | NA | YES | YES | YES |
| Met/REC | DQX1    | expr | DQX1      | 4.81928 | E  | sample_freque<br>ncy_filter | NA | NO  | NA  | NO  |
| Met/REC | DQX1    | expr | DQX1      | 4.81928 | NA | event_priority_<br>filter   | NA | NO  | NA  | NO  |
| Met/REC | ECE2    | expr | ECE2      | 6.0241  | E  | sample_freque<br>ncy_filter | NA | NO  | NA  | NO  |

|         |          |      |          |         |    |                                     |     |     |     |     |
|---------|----------|------|----------|---------|----|-------------------------------------|-----|-----|-----|-----|
| Met/REC | ECE2     | expr | ECE2     | 6.0241  | NA | sample_freque<br>ncy_filter         | NA  | NO  | NA  | NO  |
| Met/REC | EEF1B2   | mut  | EEF1B2   | 1.20482 | A  | event_priority_<br>filter           | NA  | YES | YES | NO  |
| Met/REC | FAM102A  | expr | FAM102A  | 4.81928 | E  | event_priority_<br>filter           | NA  | NO  | NA  | NO  |
| Met/REC | FAM102A  | expr | FAM102A  | 4.81928 | NA | sample_freque<br>ncy_filter         | NA  | NO  | NA  | NO  |
| Met/REC | FAM134C  | expr | FAM134C  | 6.0241  | E  | event_priority_<br>filter           | NA  | YES | YES | YES |
| Met/REC | FAM134C  | expr | FAM134C  | 6.0241  | NA | sample_freque<br>ncy_filter         | NA  | YES | YES | YES |
| Met/REC | FOXO4    | expr | FOXO4    | 6.0241  | E  | event_priority_<br>filter           | NA  | NO  | NA  | NO  |
| Met/REC | GMFB     | expr | GMFB     | 6.0241  | E  | event_priority_<br>filter           | NA  | YES | YES | YES |
| Met/REC | GTF2IRD1 | expr | GTF2IRD1 | 4.81928 | E  | event_priority_<br>filter           | NA  | NO  | NA  | NO  |
| Met/REC | ITGA9    | mut  | ITGA9    | 1.20482 | A  | ecm_focal_<br>adhesion_p<br>i3k_akt | YES | YES | YES | YES |
| Met/REC | KLF4     | mut  | KLF4     | 1.20482 | A  | event_priority_<br>filter           | NA  | YES | YES | NO  |
| Met/REC | KLHDC7B  | expr | KLHDC7B  | 6.0241  | E  | event_priority_<br>filter           | NA  | NO  | NA  | NO  |
| Met/REC | KLHDC7B  | expr | KLHDC7B  | 6.0241  | NA | sample_freque<br>ncy_filter         | NA  | NO  | NA  | NO  |
| Met/REC | LIMS1    | expr | LIMS1    | 6.0241  | E  | event_priority_<br>filter           | NA  | YES | YES | YES |
| Met/REC | LIMS1    | expr | LIMS1    | 6.0241  | NA | sample_freque<br>ncy_filter         | NA  | YES | YES | YES |
| Met/REC | MORC2    | expr | MORC2    | 4.81928 | E  | event_priority_<br>filter           | NA  | NO  | NA  | NO  |
| Met/REC | MORC2    | expr | MORC2    | 4.81928 | NA | sample_freque<br>ncy_filter         | NA  | NO  | NA  | NO  |

|         |         |      |         |         |    |                             |                                               |     |     |     |
|---------|---------|------|---------|---------|----|-----------------------------|-----------------------------------------------|-----|-----|-----|
| Met/REC | MRS2    | expr | MRS2    | 7.22892 | NA | sample_freque<br>ncy_filter | NA                                            | NO  | NA  | NO  |
| Met/REC | NPM3    | expr | NPM3    | 7.22892 | E  | event_priority_<br>filter   | NA                                            | NO  | NA  | NO  |
| Met/REC | NPM3    | expr | NPM3    | 7.22892 | NA | sample_freque<br>ncy_filter | NA                                            | NO  | NA  | NO  |
| Met/REC | NRAS    | mut  | NRAS    | 1.20482 | A  | event_priority_<br>filter   | apoptosis_<br>mapk_mtor<br>_pi3k_akt_<br>vegf | YES | YES | YES |
| Met/REC | PCBP1   | mut  | PCBP1   | 2.40964 | A  | event_priority_<br>filter   | NA                                            | YES | YES | NO  |
| Met/REC | PGS1    | expr | PGS1    | 4.81928 | E  | event_priority_<br>filter   | NA                                            | NO  | NA  | NO  |
| Met/REC | PGS1    | expr | PGS1    | 4.81928 | NA | sample_freque<br>ncy_filter | NA                                            | NO  | NA  | NO  |
| Met/REC | PJA2    | expr | PJA2    | 8.43373 | E  | event_priority_<br>filter   | NA                                            | NO  | NA  | NO  |
| Met/REC | PJA2    | expr | PJA2    | 8.43373 | NA | sample_freque<br>ncy_filter | NA                                            | NO  | NA  | NO  |
| Met/REC | PKP4    | expr | PKP4    | 7.22892 | E  | event_priority_<br>filter   | NA                                            | NO  | NA  | NO  |
| Met/REC | PKP4    | expr | PKP4    | 7.22892 | NA | sample_freque<br>ncy_filter | NA                                            | NO  | NA  | NO  |
| Met/REC | PPIAL4C | expr | PPIAL4C | 7.22892 | NA | sample_freque<br>ncy_filter | NA                                            | YES | YES | YES |
| Met/REC | PPIC    | expr | PPIC    | 4.81928 | E  | event_priority_<br>filter   | NA                                            | NO  | NA  | NO  |
| Met/REC | REXO2   | expr | REXO2   | 6.0241  | NA | sample_freque<br>ncy_filter | NA                                            | NO  | NA  | NO  |
| Met/REC | RNF139  | expr | RNF139  | 7.22892 | E  | event_priority_<br>filter   | NA                                            | NO  | NA  | NO  |
| Met/REC | RNF139  | expr | RNF139  | 7.22892 | NA | sample_freque<br>ncy_filter | NA                                            | NO  | NA  | NO  |
| Met/REC | SFRP1   | expr | SFRP1   | 4.81928 | NA | sample_freque<br>ncy_filter | wnt                                           | NO  | NA  | NO  |

|         |         |       |                                  |         |    |                             |                                                                     |     |     |     |
|---------|---------|-------|----------------------------------|---------|----|-----------------------------|---------------------------------------------------------------------|-----|-----|-----|
| Met/REC | SIGLEC1 | expr  | SIGLEC1                          | 3.61446 | E  | event_priority_<br>filter   | NA                                                                  | NO  | NA  | NO  |
| Met/REC | SLC9A5  | expr  | SLC9A5                           | 4.81928 | E  | event_priority_<br>filter   | NA                                                                  | NO  | NA  | NO  |
| Met/REC | SLC9A5  | expr  | SLC9A5                           | 4.81928 | NA | sample_freque<br>ncy_filter | NA                                                                  | NO  | NA  | NO  |
| Met/REC | TFDP1   | mut   | TFDP1                            | 2.40964 | A  | event_priority_<br>filter   | cell_cycle_t<br>gf                                                  | NO  | NA  | NO  |
| Met/REC | ZBP1    | expr  | ZBP1                             | 3.61446 | E  | event_priority_<br>filter   | NA                                                                  | NO  | NA  | NO  |
| Met/REC | ACAT2   | meth  | ACAT2_cg2350<br>0094             | 7.22892 | NA | sample_freque<br>ncy_filter | NA                                                                  | NO  | NA  | NO  |
| Met/REC | AGAP1   | meth  | AGAP1_cg0880<br>5497             | 6.0241  | NA | sample_freque<br>ncy_filter | NA                                                                  | NO  | NA  | NO  |
| Met/REC | ALDOA   | fmeth | ALDOA_ALDOA<br>_cg07025134       | 2.40964 | C  | event_priority_<br>filter   | NA                                                                  | NO  | NA  | NO  |
| Met/REC | AMH     | meth  | AMH_cg266598<br>05               | 7.22892 | NA | sample_freque<br>ncy_filter | camp_cyto<br>kine_tgf                                               | NO  | NA  | NO  |
| Met/REC | ASPSCR1 | meth  | ASPSCR1_cg06<br>238300           | 6.0241  | NA | sample_freque<br>ncy_filter | NA                                                                  | NO  | NA  | NO  |
| Met/REC | BLNK    | fmeth | BLNK_BLNK_cg<br>02980499         | 1.20482 | C  | event_priority_<br>filter   | NA                                                                  | NO  | NA  | NO  |
| Met/REC | BRMS1   | meth  | BRMS1_cg2158<br>2163             | 7.22892 | NA | sample_freque<br>ncy_filter | NA                                                                  | NO  | NA  | NO  |
| Met/REC | CAV1    | fmeth | CAV1_MIR107_<br>cg24445034       | 1.20482 | C  | event_priority_<br>filter   | focal_adhe<br>sion                                                  | YES | YES | YES |
| Met/REC | CCDC59  | fmeth | CCDC59_CCD<br>C59_cg0190390<br>3 | 1.20482 | C  | event_priority_<br>filter   | NA                                                                  | YES | YES | NO  |
| Met/REC | CCND2   | meth  | CCND2_cg0380<br>1902             | 6.0241  | NA | sample_freque<br>ncy_filter | cell_cycle_f<br>ocal_adhes<br>ion_jak_sta<br>t_p53_pi3k<br>_akt_wnt | NO  | NA  | NO  |
| Met/REC | CHAF1A  | meth  | CHAF1A_cg238<br>11775            | 9.63855 | NA | sample_freque<br>ncy_filter | NA                                                                  | NO  | NA  | NO  |

|         |          |       |                            |         |    |                 |     |     |     |     |
|---------|----------|-------|----------------------------|---------|----|-----------------|-----|-----|-----|-----|
| Met/REC | CHST12   | meth  | CHST12_cg10145585          | 6.0241  | NA | sample_freque   |     |     |     |     |
|         |          |       | CRABP2_cg27493997          | 6.0241  | NA | ncy_filter      | NA  | NO  | NA  | NO  |
| Met/REC | CRABP2   | meth  |                            |         |    | sample_freque   |     |     |     |     |
|         |          |       | CROCC_CROC                 |         |    | ncy_filter      | NA  | NO  | NA  | NO  |
| Met/REC | CROCC    | fmeth | C_cg23732962               | 1.20482 | C  | event_priority_ |     |     |     |     |
|         |          |       | CYBA_CYBA_c                |         |    | filter          | NA  | NO  | NA  | NO  |
| Met/REC | CYBA     | fmeth | g24046411                  | 1.20482 | C  | event_priority_ |     |     |     |     |
|         |          |       | CYBA_CYBA_c                |         |    | filter          | NA  | NO  | NA  | NO  |
| Met/REC | CYBA     | fmeth | g27176614                  | 1.20482 | C  | event_priority_ |     |     |     |     |
|         |          |       | DCAF12L1_cg01913196        | 4.81928 | NA | filter          | NA  | NO  | NA  | NO  |
| Met/REC | DCAF12L1 | meth  |                            |         |    | sample_freque   |     |     |     |     |
|         |          |       | DLG2_cg10901805            | 7.22892 | NA | ncy_filter      | NA  | NO  | NA  | NO  |
| Met/REC | DLG2     | meth  |                            |         |    | sample_freque   |     |     |     |     |
|         |          |       | DPP9_cg24423897            | 7.22892 | NA | ncy_filter      | NA  | NO  | NA  | NO  |
| Met/REC | DPP9     | meth  |                            |         |    | sample_freque   |     |     |     |     |
|         |          |       | DPYSL2_cg02835343          | 7.22892 | NA | ncy_filter      | NA  | NO  | NA  | NO  |
| Met/REC | DPYSL2   | meth  |                            |         |    | sample_freque   |     |     |     |     |
|         |          |       | EGLN1_cg20015535           | 7.22892 | NA | ncy_filter      | NA  | YES | YES | YES |
| Met/REC | EGLN1    | meth  |                            |         |    | sample_freque   |     |     |     |     |
|         |          |       | EIF5A_cg24699433           | 7.22892 | NA | ncy_filter      | NA  | NO  | NA  | NO  |
| Met/REC | EIF5A    | meth  |                            |         |    | event_priority_ |     |     |     |     |
|         |          |       | EIF5A2 EIF5A2_cg12598803   | 1.20482 | C  | filter          | NA  | NO  | NA  | NO  |
| Met/REC | EIF5A2   | fmeth |                            |         |    | event_priority_ |     |     |     |     |
|         |          |       | EIF5A2 EIF5A2_cg26209058   | 1.20482 | C  | filter          | NA  | NO  | NA  | NO  |
| Met/REC | EIF5A2   | fmeth |                            |         |    | sample_freque   |     |     |     |     |
|         |          |       | EN1_cg02739346             | 4.81928 | NA | ncy_filter      | NA  | NO  | NA  | NO  |
| Met/REC | EN1      | meth  |                            |         |    |                 |     |     |     |     |
|         |          |       | EP400NL_EP400NL_cg25632983 | 1.20482 | C  | event_priority_ |     |     |     |     |
| Met/REC | EP400NL  | fmeth |                            |         |    | filter          | NA  | NO  | NA  | NO  |
|         |          |       | ERBB2_MIR125A_cg19782652   | 1.20482 | C  | adherens_f      |     |     |     |     |
| Met/REC | ERBB2    | fmeth |                            |         |    | ocal_adhes      |     |     |     |     |
|         |          |       | ERBB2_MIR134_cg26238975    | 1.20482 | C  | ion             | YES | YES | YES | NO  |
| Met/REC | ERBB2    | fmeth |                            |         |    | adherens_f      |     |     |     |     |
|         |          |       |                            |         |    | ocal_adhes      | NO  | NA  | NO  | NO  |

|         |        |       |                          |         |    |                 |          |     |     |     |
|---------|--------|-------|--------------------------|---------|----|-----------------|----------|-----|-----|-----|
|         |        |       |                          |         |    |                 | ion      |     |     |     |
| Met/REC | FBLN5  | meth  | FBLN5_cg21883802         | 7.22892 | NA | sample_freque   |          |     |     |     |
|         |        |       |                          |         |    | ncy_filter      | NA       | NO  | NA  | NO  |
| Met/REC | FBN1   | meth  | FBN1_cg12975862          | 4.81928 | NA | sample_freque   |          |     |     |     |
|         |        |       |                          |         |    | ncy_filter      | NA       | NO  | NA  | NO  |
| Met/REC | FBXO43 | meth  | FBXO43_cg23700125        | 9.63855 | NA | sample_freque   |          |     |     |     |
|         |        |       |                          |         |    | ncy_filter      | NA       | NO  | NA  | NO  |
| Met/REC | FNTA   | fmeth | FNTA_FNTA_cg07294234     | 2.40964 | C  | event_priority_ |          |     |     |     |
|         |        |       |                          |         |    | filter          | NA       | YES | YES | YES |
| Met/REC | GALNT2 | meth  | GALNT2_cg00589617        | 6.0241  | F  | event_priority_ |          |     |     |     |
|         |        |       |                          |         |    | filter          | NA       | NO  | NA  | NO  |
| Met/REC | GALNT2 | meth  | GALNT2_cg00589617        | 6.0241  | NA | sample_freque   |          |     |     |     |
|         |        |       |                          |         |    | ncy_filter      | NA       | NO  | NA  | NO  |
| Met/REC | GDAP1  | fmeth | GDAP1_GDAP1_cg22105613   | 2.40964 | C  | event_priority_ |          |     |     |     |
|         |        |       |                          |         |    | filter          | NA       | NO  | NA  | NO  |
| Met/REC | GLRX5  | meth  | GLRX5_cg26007049         | 7.22892 | NA | sample_freque   |          |     |     |     |
|         |        |       |                          |         |    | ncy_filter      | NA       | NO  | NA  | NO  |
| Met/REC | GNB4   | fmeth | GNB4_GNB4_cg01750654     | 1.20482 | C  | event_priority_ |          |     |     |     |
|         |        |       |                          |         |    | filter          | pi3k_akt | NO  | NA  | NO  |
| Met/REC | HAUS5  | fmeth | HAUS5_HAUS5_cg05296832   | 1.20482 | C  | event_priority_ |          |     |     |     |
|         |        |       |                          |         |    | filter          | NA       | NO  | NA  | NO  |
| Met/REC | HEATR1 | meth  | HEATR1_cg00907549        | 7.22892 | NA | sample_freque   |          |     |     |     |
|         |        |       |                          |         |    | ncy_filter      | NA       | NO  | NA  | NO  |
| Met/REC | HNRNPM | fmeth | HNRNPM_HNRNPM_cg05923062 | 1.20482 | C  | event_priority_ |          |     |     |     |
|         |        |       |                          |         |    | filter          | NA       | NO  | NA  | NO  |
| Met/REC | HOMER3 | fmeth | HOMER3_HOMER3_cg19788957 | 1.20482 | C  | event_priority_ |          |     |     |     |
|         |        |       |                          |         |    | filter          | NA       | NO  | NA  | NO  |
| Met/REC | HTR3E  | fmeth | HTR3E_HTR3E_cg11158819   | 1.20482 | C  | event_priority_ |          |     |     |     |
|         |        |       |                          |         |    | filter          | NA       | NO  | NA  | NO  |
| Met/REC | KLHL20 | meth  | KLHL20_cg11720170        | 7.22892 | NA | sample_freque   |          |     |     |     |
|         |        |       |                          |         |    | ncy_filter      | NA       | NO  | NA  | NO  |
| Met/REC | LBH    | meth  | LBH_cg25072436           | 7.22892 | NA | sample_freque   |          |     |     |     |
|         |        |       |                          |         |    | ncy_filter      | NA       | NO  | NA  | NO  |

|         |         |       |                            |         |    |                         |               |     |     |     |
|---------|---------|-------|----------------------------|---------|----|-------------------------|---------------|-----|-----|-----|
| Met/REC | LMX1A   | fmeth | LMX1A_LMX1A_cg23971170     | 1.20482 | C  | event_priority_filter   | NA            | NO  | NA  | NO  |
| Met/REC | LRRK1   | meth  | LRRK1_cg24163563           | 6.0241  | NA | sample_frequency_filter | NA            | NO  | NA  | NO  |
| Met/REC | MAGEA10 | fmeth | MAGEA10_MAGEA10_cg19964192 | 1.20482 | C  | event_priority_filter   | NA            | NO  | NA  | NO  |
| Met/REC | MAN2B1  | meth  | MAN2B1_cg02484047          | 8.43373 | NA | sample_frequency_filter | NA            | NO  | NA  | NO  |
| Met/REC | MAPK12  | meth  | MAPK12_cg21974239          | 8.43373 | NA | sample_frequency_filter | mapk_vegf     | NO  | NA  | NO  |
| Met/REC | MBP     | meth  | MBP_cg00989538             | 6.0241  | NA | sample_frequency_filter | NA            | NO  | NA  | NO  |
| Met/REC | MED11   | meth  | MED11_cg09832947           | 8.43373 | NA | sample_frequency_filter | NA            | NO  | NA  | NO  |
| Met/REC | MORF4L1 | fmeth | MORF4L1_MORF4L1_cg20905746 | 1.20482 | C  | event_priority_filter   | NA            | NO  | NA  | NO  |
| Met/REC | NLGN2   | meth  | NLGN2_cg10092265           | 7.22892 | NA | sample_frequency_filter | NA            | NO  | NA  | NO  |
| Met/REC | NOS3    | meth  | NOS3_cg12547085            | 7.22892 | NA | sample_frequency_filter | pi3k_akt_vegf | NO  | NA  | NO  |
| Met/REC | NR1H2   | meth  | NR1H2_cg14673743           | 4.81928 | NA | sample_frequency_filter | NA            | NO  | NA  | NO  |
| Met/REC | PCCB    | meth  | PCCB_cg05582311            | 7.22892 | NA | sample_frequency_filter | NA            | YES | YES | YES |
| Met/REC | PCNT    | fmeth | PCNT_PCNT_cg13822122       | 1.20482 | C  | event_priority_filter   | NA            | NO  | NA  | NO  |
| Met/REC | PNMT    | fmeth | PNMT_PNMT_cg16268778       | 1.20482 | C  | event_priority_filter   | NA            | NO  | NA  | NO  |
| Met/REC | PPP1R1B | fmeth | PPP1R1B_PPP1R1B_cg06068801 | 1.20482 | C  | event_priority_filter   | camp          | NO  | NA  | NO  |
| Met/REC | PPP1R1B | fmeth | PPP1R1B_PPP1R1B_cg09762778 | 1.20482 | C  | event_priority_filter   | camp          | NO  | NA  | NO  |



|         |         |       |                          |         |    |                         |           |     |     |     |
|---------|---------|-------|--------------------------|---------|----|-------------------------|-----------|-----|-----|-----|
| Met/REC | PRF1    | fmeth | PRF1_PRF1_cg12336290     | 1.20482 | C  | event_priority_filter   | apoptosis | NO  | NA  | NO  |
| Met/REC | RBMS2   | meth  | RBMS2_cg23002907         | 8.43373 | NA | sample_frequency_filter | NA        | NO  | NA  | NO  |
| Met/REC | RNF138  | meth  | RNF138_cg22141237        | 4.81928 | NA | sample_frequency_filter | NA        | NO  | NA  | NO  |
| Met/REC | RPLP2   | meth  | RPLP2_cg01485797         | 6.0241  | NA | sample_frequency_filter | NA        | YES | YES | YES |
| Met/REC | RPRD1A  | fmeth | RPRD1A_RPRD1A_cg00019809 | 1.20482 | C  | event_priority_filter   | NA        | NO  | NA  | NO  |
| Met/REC | RPRD1A  | fmeth | RPRD1A_RPRD1A_cg19629710 | 1.20482 | C  | event_priority_filter   | NA        | YES | YES | NO  |
| Met/REC | RYBP    | meth  | RYBP_cg04421631          | 7.22892 | NA | sample_frequency_filter | NA        | NO  | NA  | NO  |
| Met/REC | SLC45A4 | meth  | SLC45A4_cg08829393       | 7.22892 | NA | sample_frequency_filter | NA        | YES | YES | YES |
| Met/REC | SNUPN   | meth  | SNUPN_cg22258732         | 4.81928 | NA | sample_frequency_filter | NA        | NO  | NA  | NO  |
| Met/REC | SORBS3  | meth  | SORBS3_cg07924703        | 6.0241  | NA | sample_frequency_filter | NA        | NO  | NA  | NO  |
| Met/REC | SPIRE2  | meth  | SPIRE2_cg07402062        | 8.43373 | NA | sample_frequency_filter | NA        | NO  | NA  | NO  |
| Met/REC | SPOPL   | fmeth | SPOPL_SPOPL_cg09464263   | 1.20482 | C  | event_priority_filter   | NA        | NO  | NA  | NO  |
| Met/REC | STIM1   | meth  | STIM1_cg04346968         | 6.0241  | NA | sample_frequency_filter | NA        | NO  | NA  | NO  |
| Met/REC | TAF1D   | fmeth | TAF1D_TAF1D_cg10353388   | 1.20482 | C  | event_priority_filter   | NA        | NO  | NA  | NO  |
| Met/REC | TEX11   | meth  | TEX11_cg08167097         | 7.22892 | NA | sample_frequency_filter | NA        | NO  | NA  | NO  |
| Met/REC | TNK2    | meth  | TNK2_cg03207310          | 4.81928 | NA | sample_frequency_filter | NA        | NO  | NA  | NO  |
| Met/REC | TNPO1   | meth  | TNPO1_cg05579703         | 6.0241  | NA | sample_frequency_filter | NA        | NO  | NA  | NO  |

|         |        |       |                              |         |    |                             |    |     |     |     |
|---------|--------|-------|------------------------------|---------|----|-----------------------------|----|-----|-----|-----|
| Met/REC | TOLLIP | meth  | TOLLIP_cg0136<br>9233        | 6.0241  | NA | sample_freque<br>ncy_filter | NA | YES | YES | YES |
| Met/REC | TRRAP  | meth  | TRRAP_cg0345<br>7229         | 6.0241  | NA | sample_freque<br>ncy_filter | NA | NO  | NA  | NO  |
| Met/REC | UMPS   | meth  | UMPS_cg15050<br>328          | 6.0241  | NA | sample_freque<br>ncy_filter | NA | YES | YES | YES |
| Met/REC | UST    | meth  | UST_cg212730<br>29           | 6.0241  | NA | sample_freque<br>ncy_filter | NA | NO  | NA  | NO  |
| Met/REC | WDR66  | meth  | WDR66_cg0176<br>5077         | 6.0241  | NA | sample_freque<br>ncy_filter | NA | NO  | NA  | NO  |
| Met/REC | ZFH3   | meth  | ZFH3_cg0570<br>4496          | 6.0241  | NA | sample_freque<br>ncy_filter | NA | NO  | NA  | NO  |
| Met/REC | ZIC3   | fmeth | ZIC3_ZIC3_cg1<br>0451760     | 1.20482 | C  | event_priority_<br>filter   | NA | NO  | NA  | NO  |
| Met/REC | ZNF121 | meth  | ZNF121_cg069<br>98238        | 6.0241  | NA | sample_freque<br>ncy_filter | NA | YES | YES | YES |
| Met/REC | ZNF410 | fmeth | ZNF410_ZNF41<br>0_cg12152256 | 1.20482 | C  | event_priority_<br>filter   | NA | NO  | NA  | NO  |
| Met/REC | ZNF490 | meth  | ZNF490_cg240<br>93429        | 6.0241  | NA | sample_freque<br>ncy_filter | NA | YES | YES | YES |
| Met/REC | ZNF497 | fmeth | ZNF497_ZNF49<br>7_cg14989522 | 1.20482 | C  | event_priority_<br>filter   | NA | NO  | NA  | NO  |
| Met/REC | ZNF516 | meth  | ZNF516_cg162<br>75118        | 9.63855 | F  | event_priority_<br>filter   | NA | NO  | NA  | NO  |
| Met/REC | ZNF516 | meth  | ZNF516_cg162<br>75118        | 9.63855 | NA | sample_freque<br>ncy_filter | NA | NO  | NA  | NO  |
| Met/REC | ZNF580 | meth  | ZNF580_cg262<br>09676        | 4.81928 | NA | sample_freque<br>ncy_filter | NA | NO  | NA  | NO  |
| Met/REC | ZNF581 | meth  | ZNF581_cg262<br>09676        | 4.81928 | NA | sample_freque<br>ncy_filter | NA | NO  | NA  | NO  |
| Met/REC | ZNF791 | meth  | ZNF791_cg240<br>93429        | 6.0241  | NA | sample_freque<br>ncy_filter | NA | YES | YES | YES |
